# Supplementary material
Source: PubMed Central journal article supplement (PMC6438178)
Supplement: NIHMS1519975-supplement-Data_S1.pdf [file NIHMS1519975-supplement-Data_S1.pdf]

# BAB572

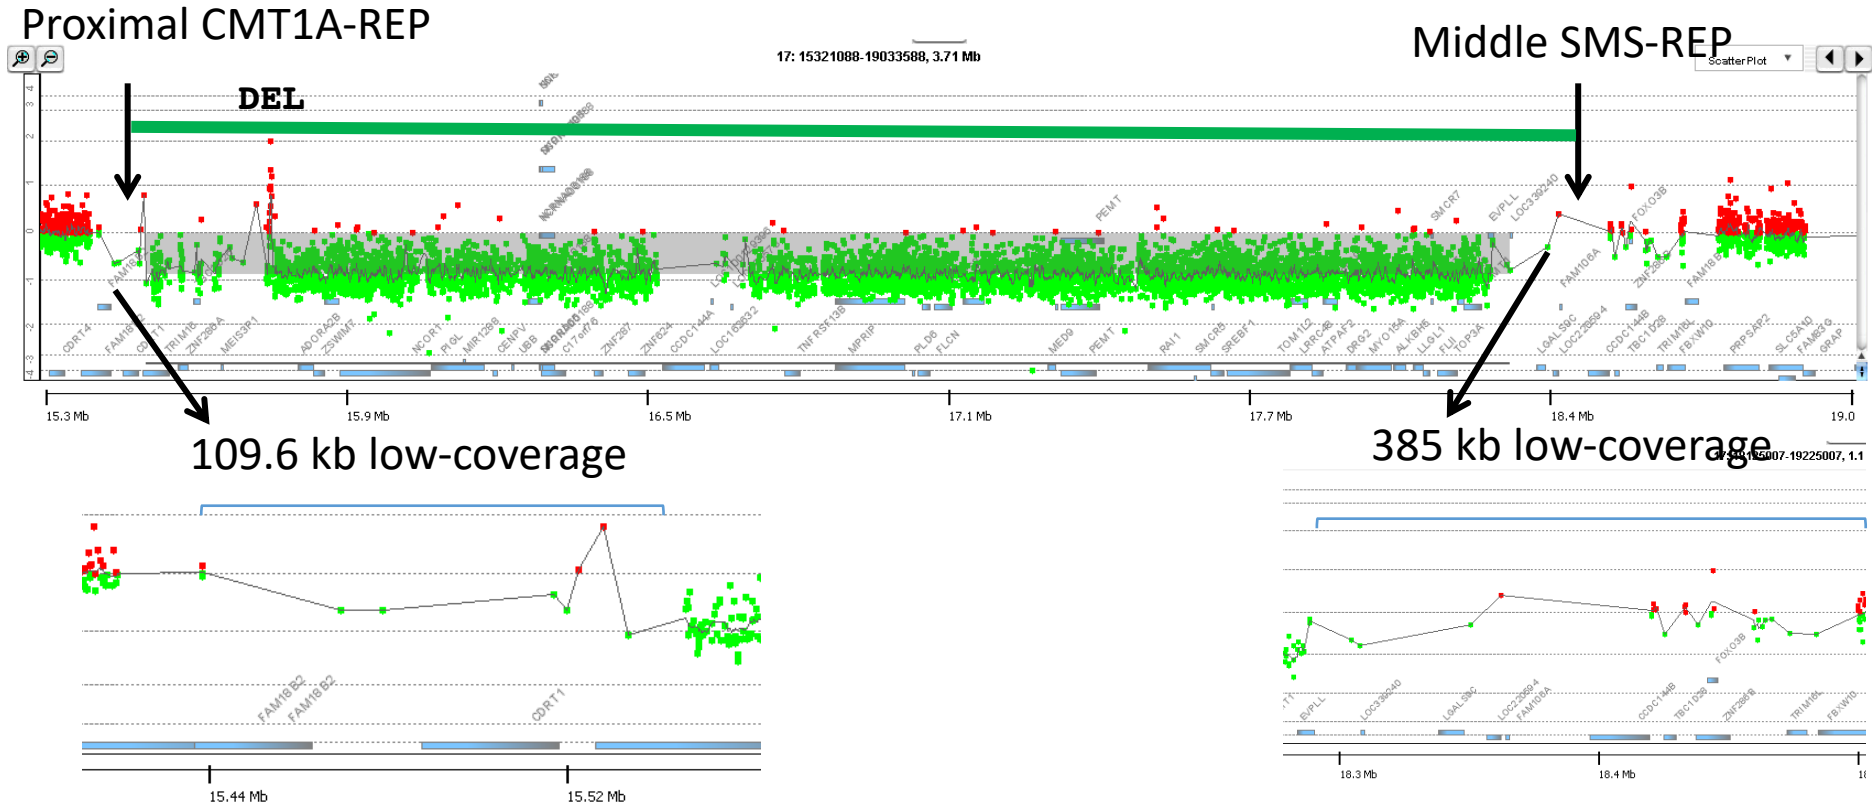

Precise junction not mapped

# BAB641

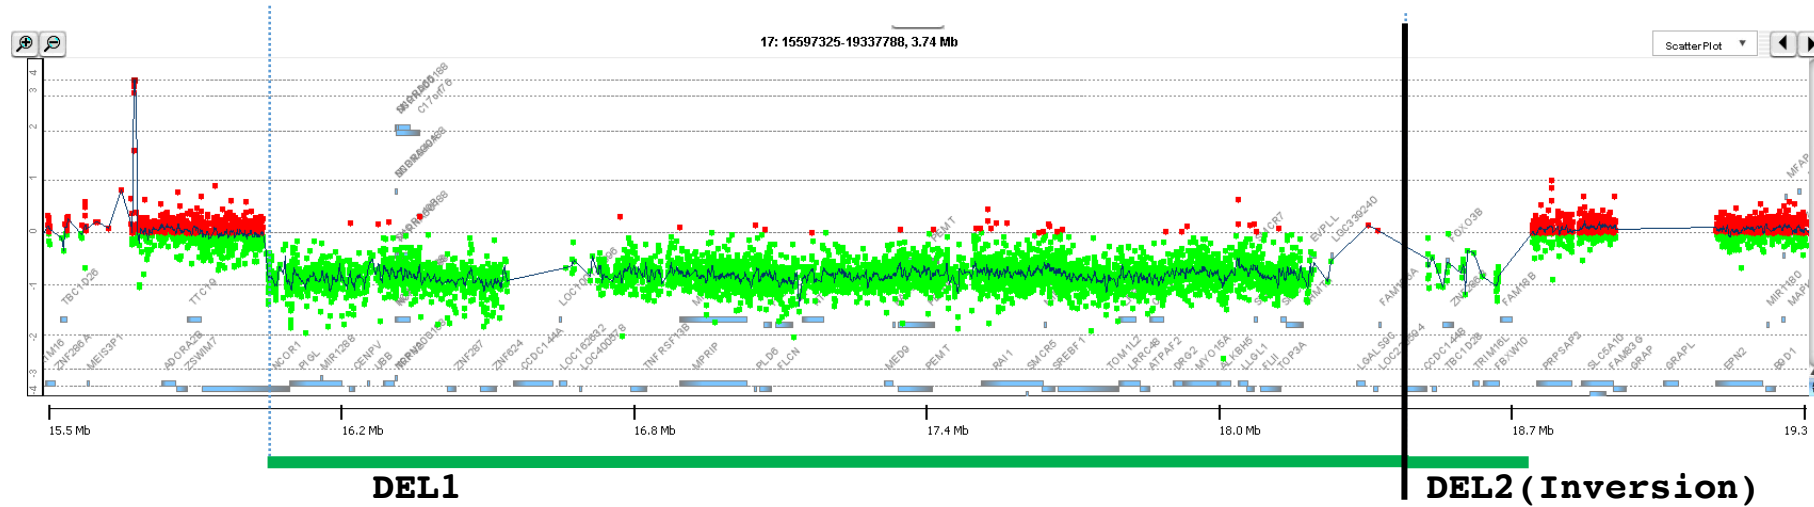

16066603

← Ref\_NCOR1 LCR(LINE) (+) AAAATATCTATTAAGTCATACATCTGATGAGG**aACtAATGT**ccagaatataaaagaa

BAB641 AAAATATCTATTAAGTCATACATCTGATGAGG**-ACaAATGT**GTGATGGCATGTATATA

← Ref\_CCDC144B (-) cactcttggtttgtacattctatggtggt**GG-ACaAATGT**GTGATGGCATGTATATA

Middle- SMS-REP

18517335

Jct contains inverted breakpoint between beginning of DEL1 and beginning of DEL2

# BAB641

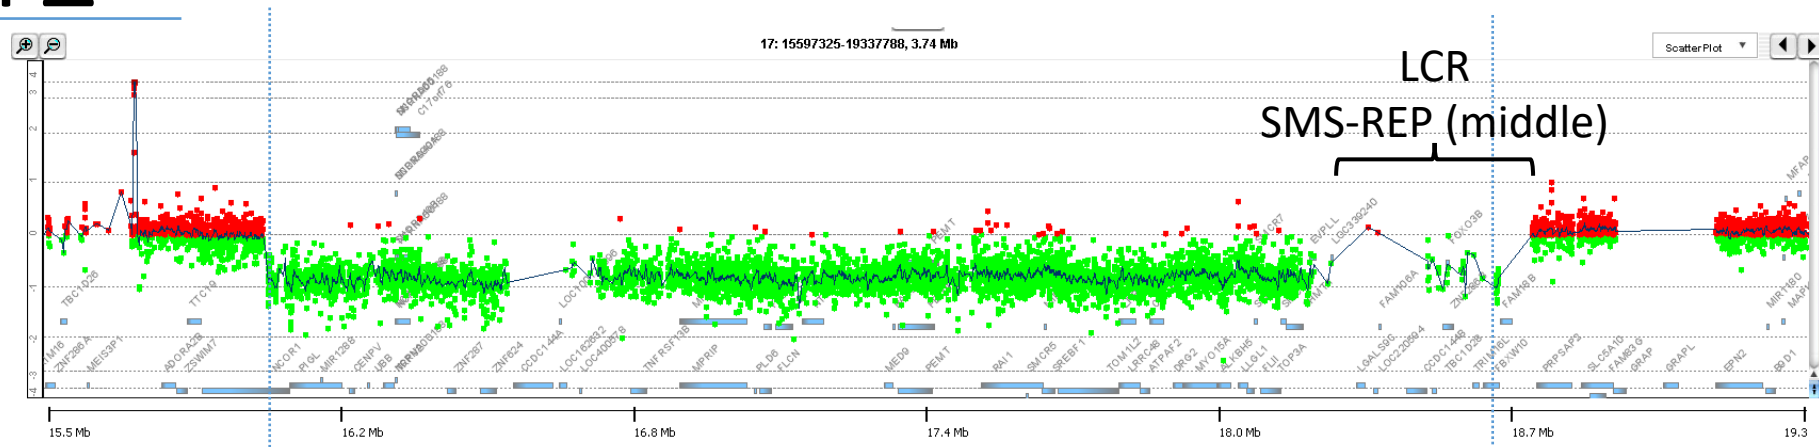

Jct obtained by PacBio and Sanger

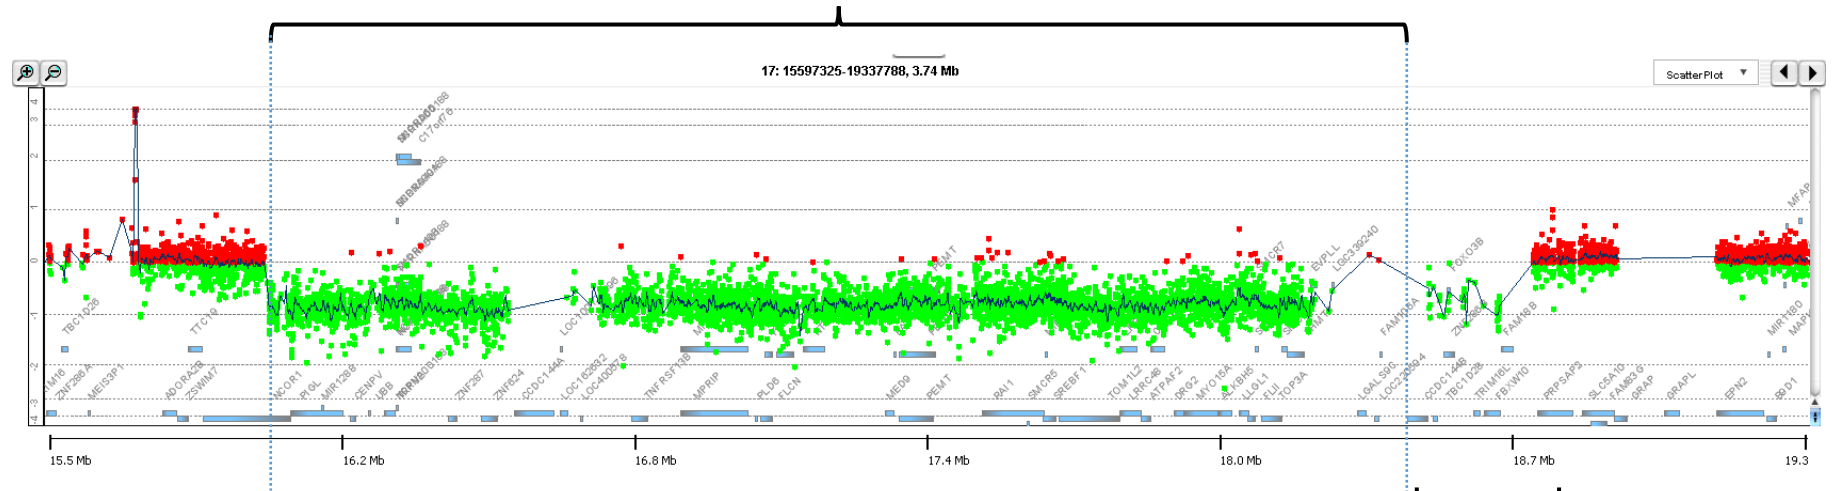

PacBio detected an INV not DEL:

Inherited inversion? ->

Deletion appears *de novo*; flanked by 99% identical IRs (IR1 and IR2)

# BAB641

Seven individuals have discordant fosmid clones (HGSV track) indicating inversion between IR1 and IR2 is common

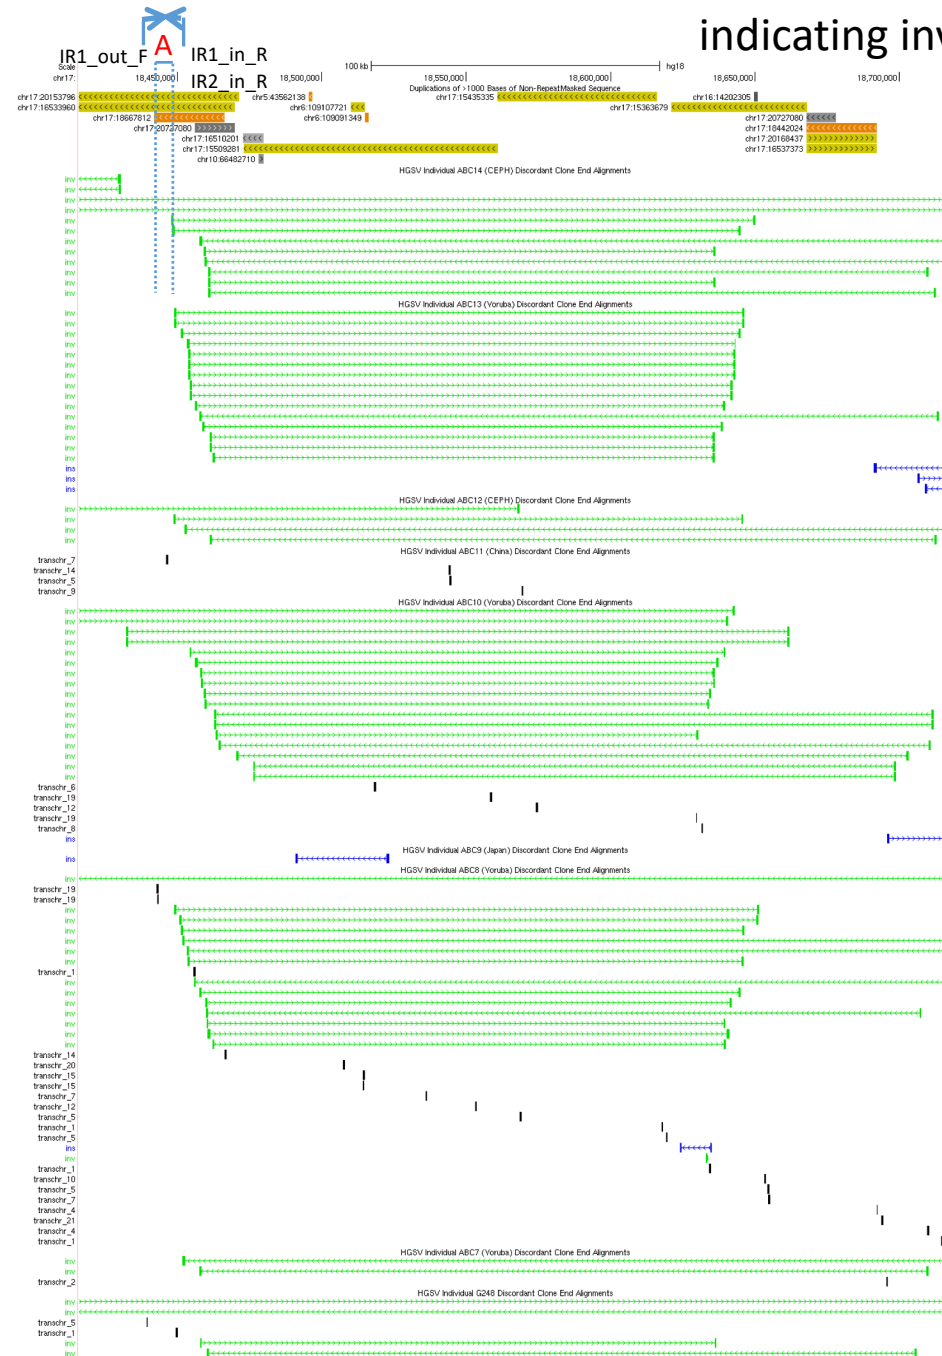

# BAB649

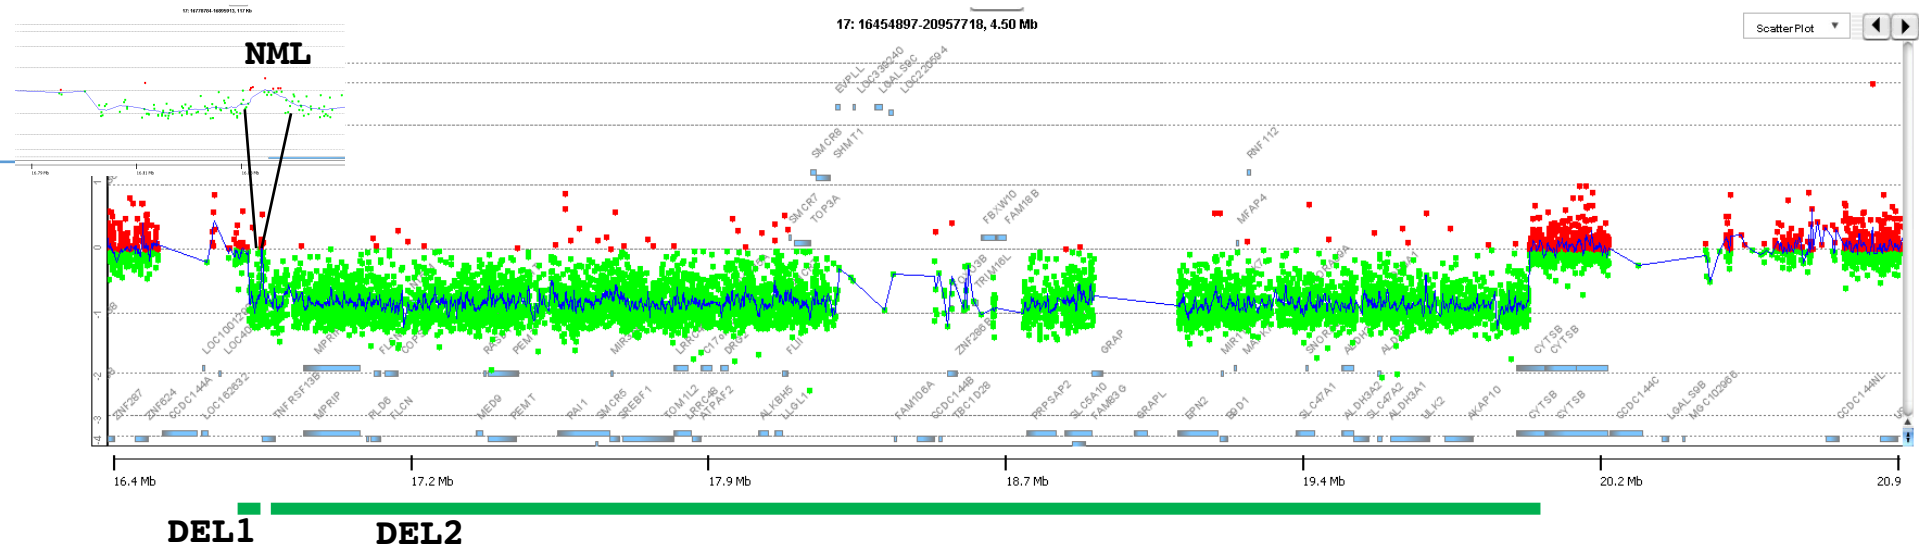

16808862

LCR(LINE) (+) CGTCTTgtgtctctGTGTCTCTATGTTTAG**CTCCaATT**tataagtgagaacatacagtat

BAB649\_jct1 CGTCTT  GTGTCTCTATGTTTAG**CTCCaATT**AGACAGTTGCCATTGCTGCACA  
 16808831  16808838

← TNFRSF13B (LINE) (-) acagggtttctgtttggtgataaaaattgt**CTCCaATT**AGACAGTTGCCATTGCTGCACA

*de novo* 8 bp del

16845031

16838686

← TNFRSF13B (-) GGTGACCTCATGCAGGGGTTTGTCTTGGAGCTTGCTTGCcgccatctgtagtggggatg

BAB649\_jct2 GGTGACCTCATGCAGGGGTTTGTCTTGGAGCTTGCTTGCtgctGGAACGGTGGACAAAG

→ SPECC1 (+) aaccttaggcattctggaactgaagaggtgctagggcagctcagTGAACGGTGGACAAAG

20020394

# BAB765

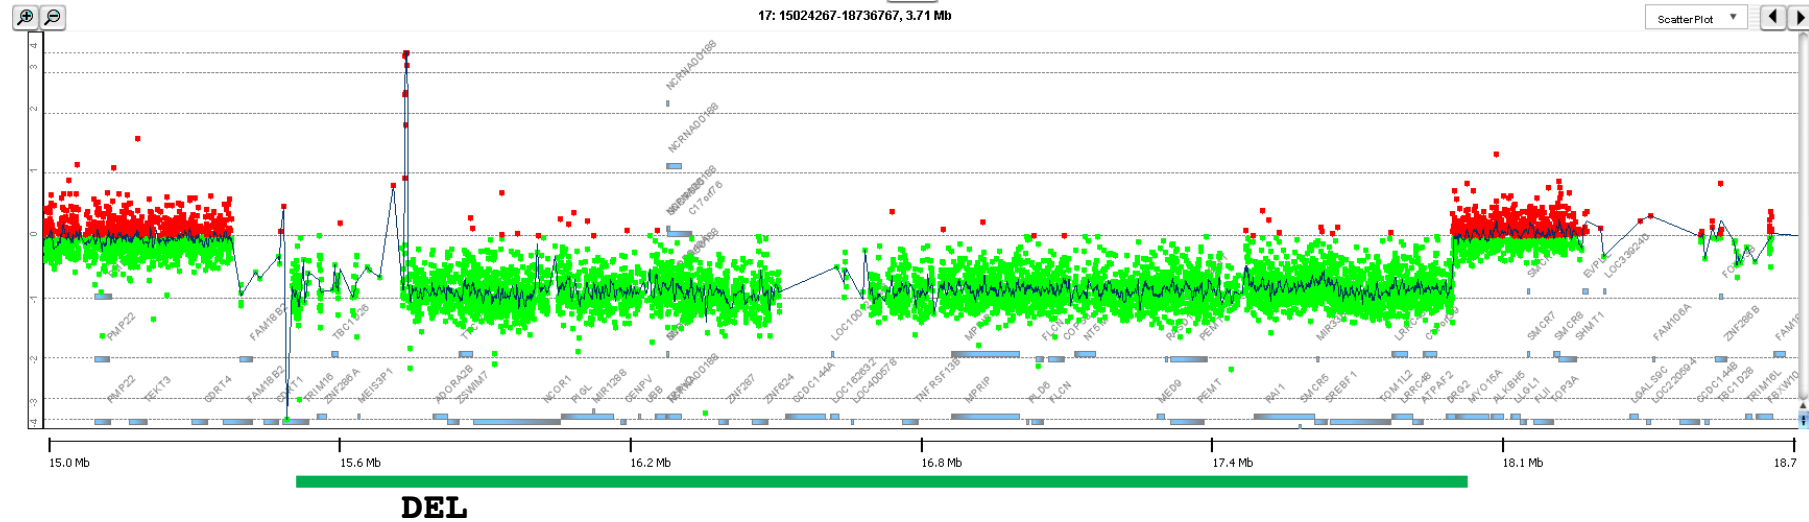

15441705

AluY (LCR) (+) AGGCCGAGGAGGGTGGATCATGAGGTCAGGAGATCGAGACcctcctggctaacacagt

BAB765 AGGCCGAGGAGGGTGGATCATGAGGTCAGGAGATCGAGACTATCCTGGCCAACATGGT

AluSg<sub>DRG2</sub> (+) gggctgtggcGGGTGGATCATGAGGTCAGGAGATCGAGACTATCCTGGCCAACATGGT

18005708

# BAB1354

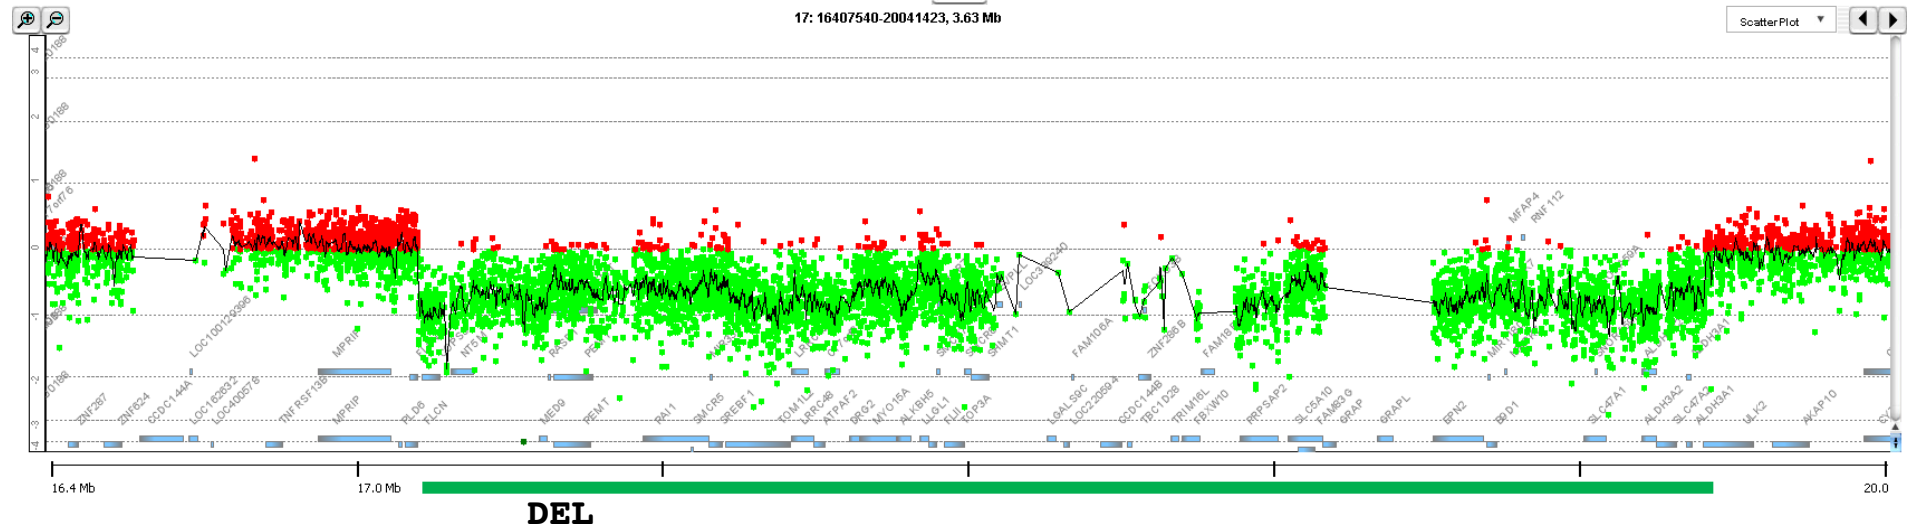

17141946

AluSc (+) **AAAAATTAGCTGGGCGTGGTGGCACACGCCTGTAGTCCAGCTACTC**tggtggctgaggcagg

**BAB1354** **AAAAATTAGCTGGGCGTGGTGGCACACGCCTGTAGTCCAGCTACTC**GGGTGGCTGAGGCGGG

← AluY\_ULK2 (+) **aaaaatcagccgggcgtggtggcaggCGCCTGTAGTCCAGCTACTC**GGGAGGCTGAGGCGGG

19676163

# BAB2564

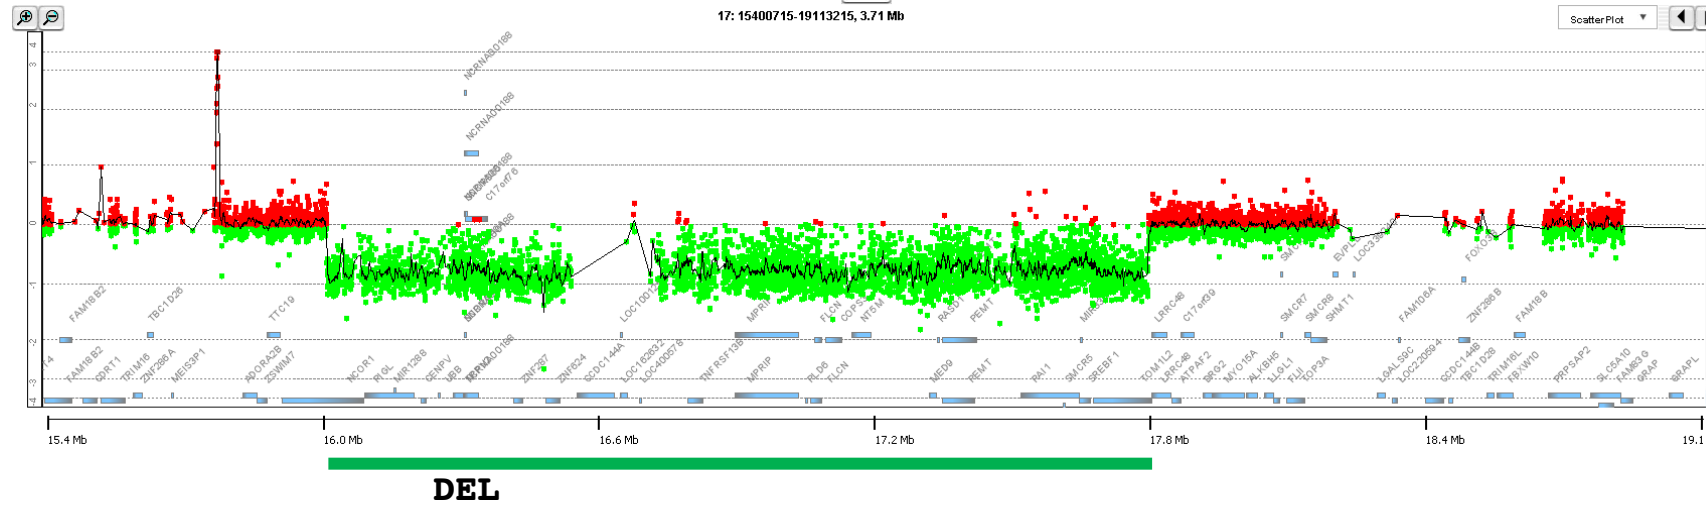

← Ref\_NCOR1 (+) CATTACTTCAACAAAACATAT**AGAgAACCAc**actcactctccatggaatggtaaca  
 BAB2564 CATTACTTCAACAAAACATAT**AGAgAACCAc**-CATCCTTTTCCATTTCTACACAAAC  
 ← Ref\_TOM1L2 (+) ttgctcaagttgtctctgcca**AGA-AACCAa**aCATCCTTTTCCATTTCTACACAAAC

16035839 SNV called by Atlas2  
 17868741



# BAB1931

## BAB1931: 3 de novo deletions (trio aCGH data)

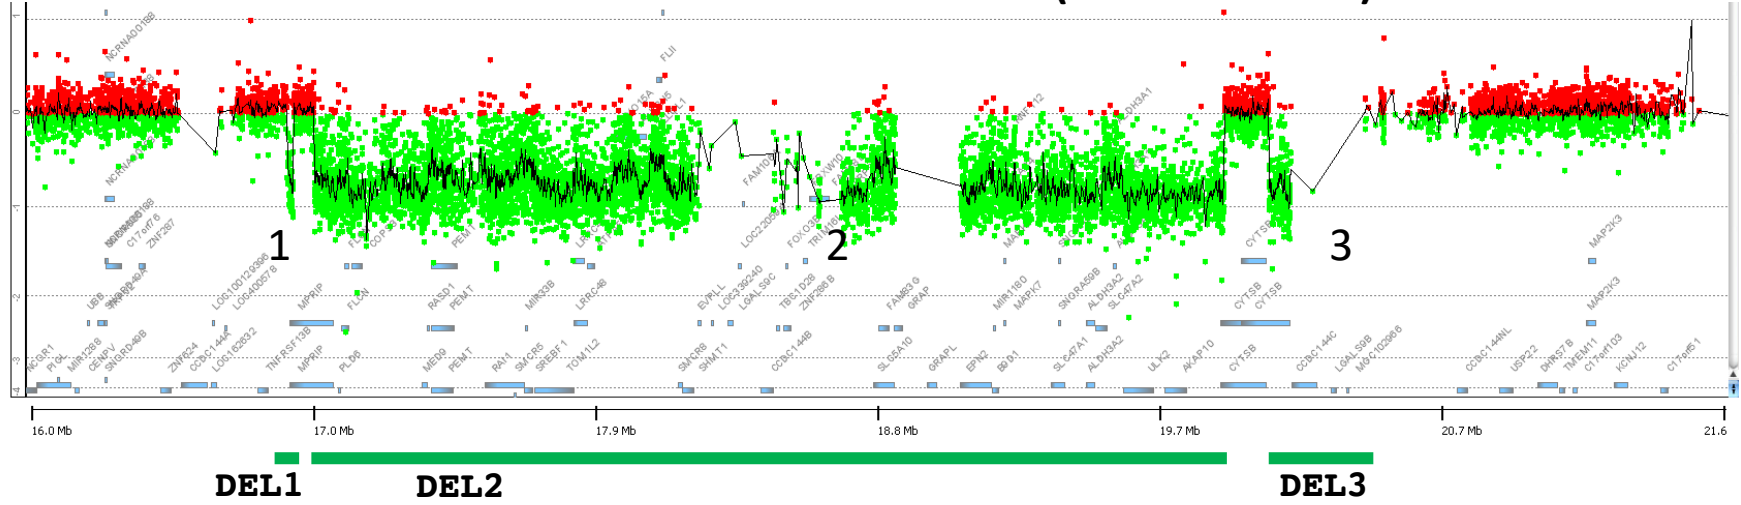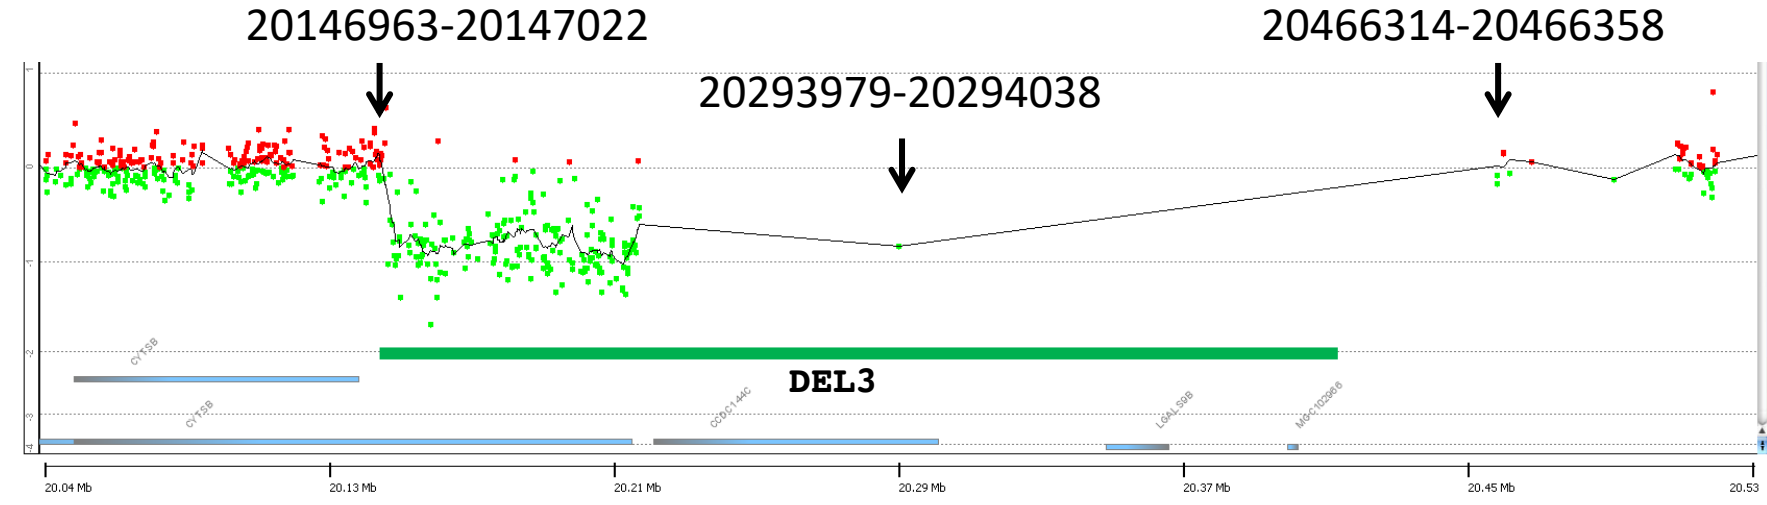

# BAB1931

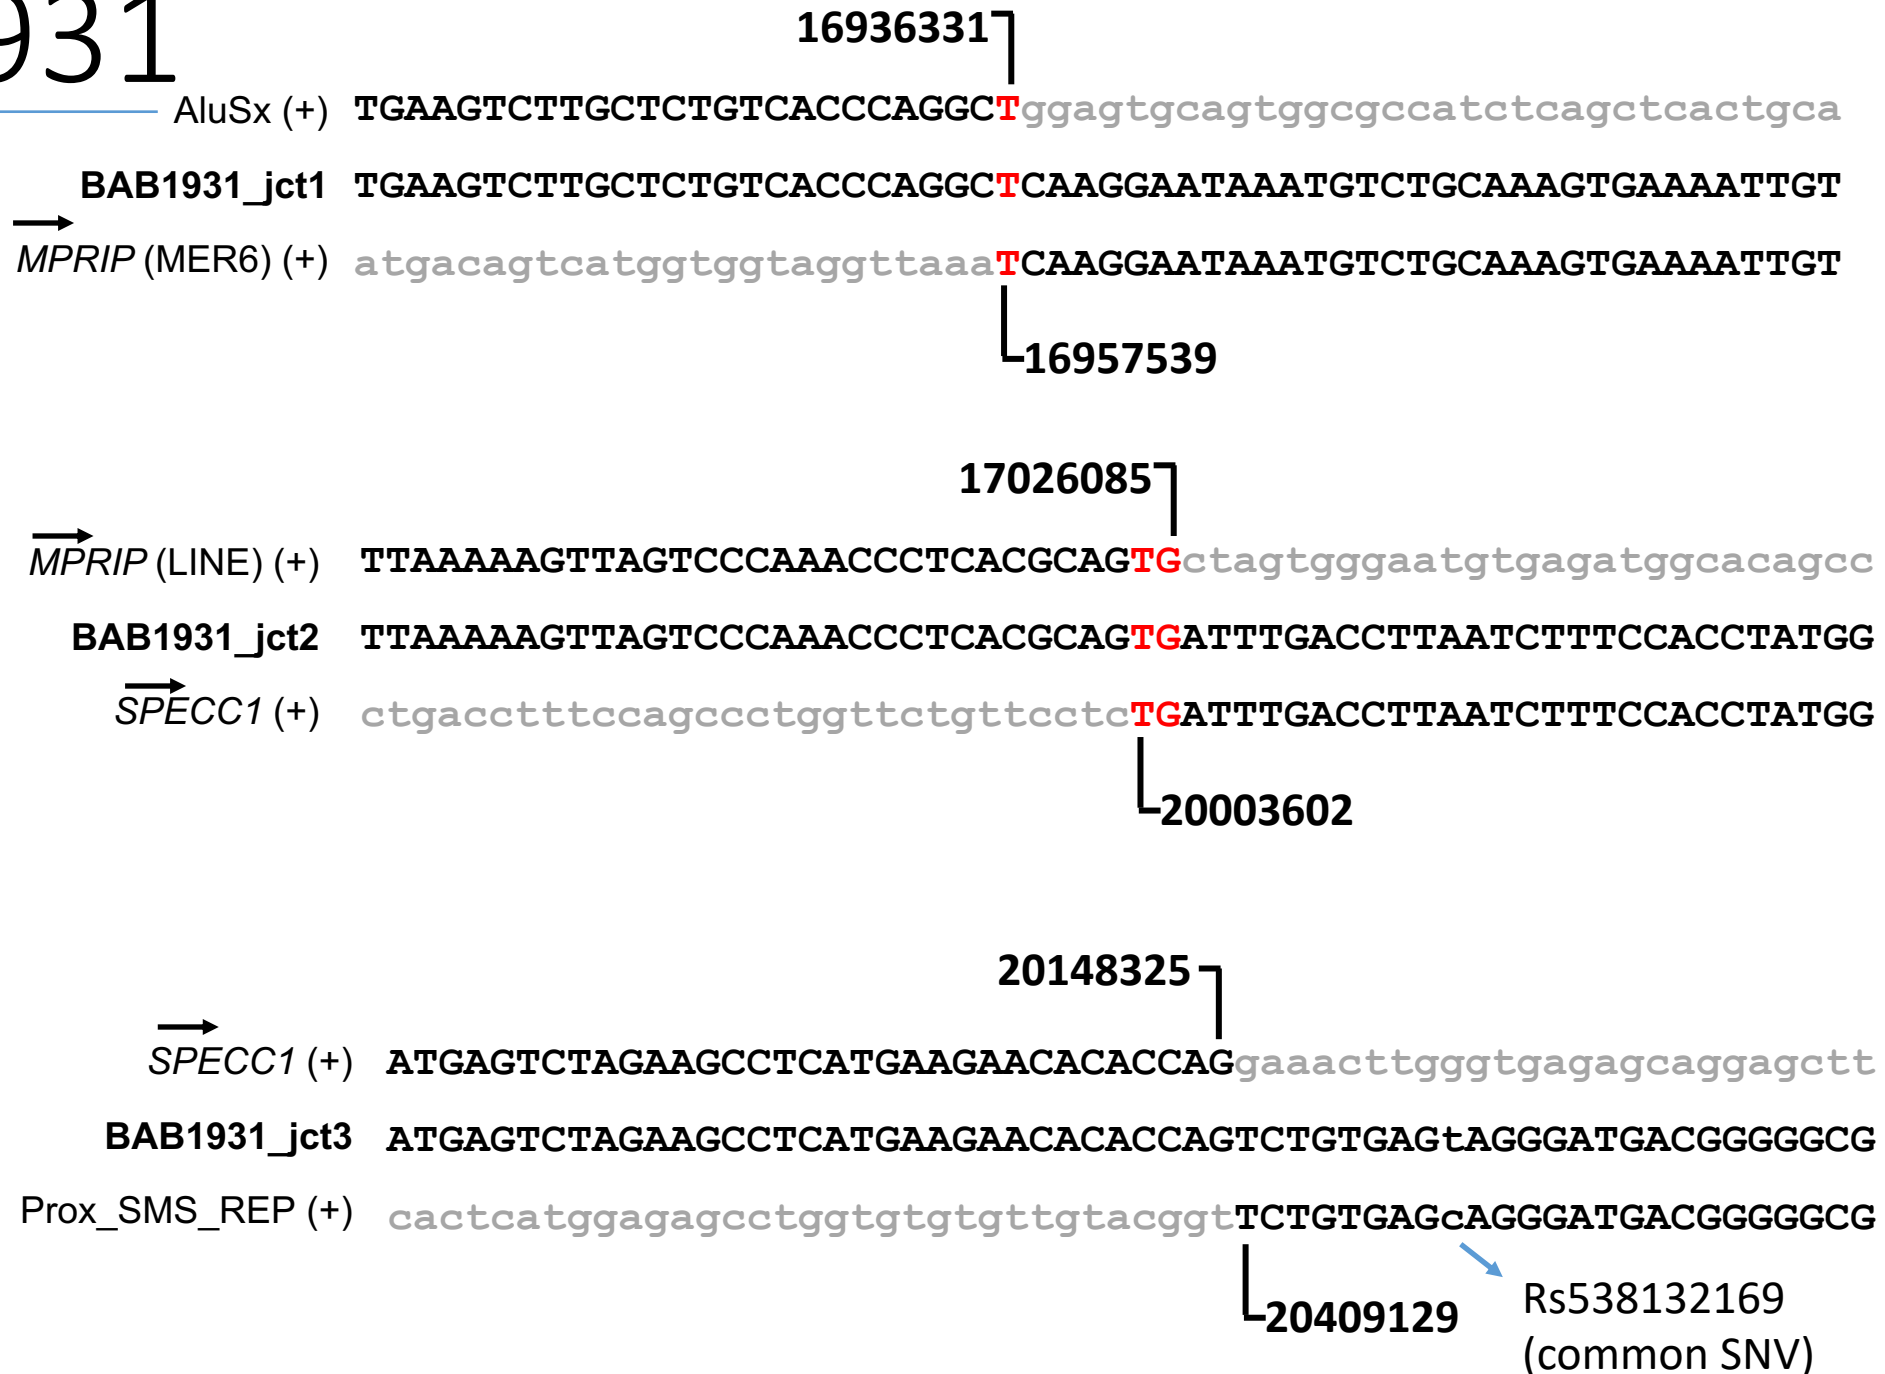

# BAB3031

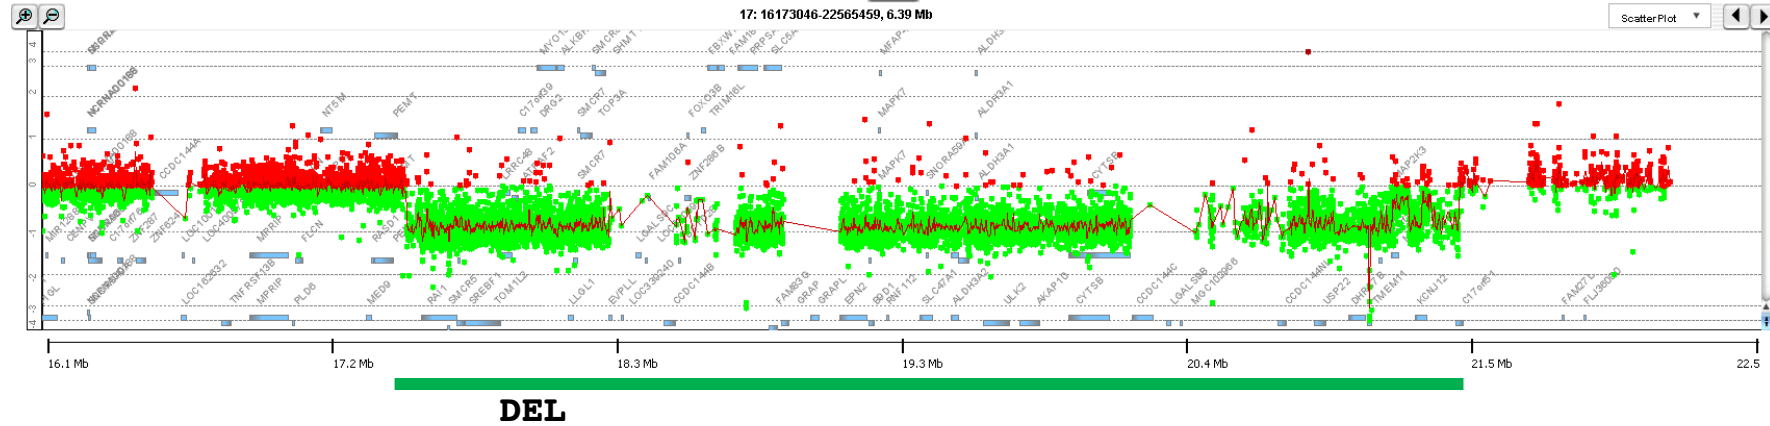

17528139

Intragenic (+) TAAGTAAAGGAGCTCCCTTGAGAA**GAG**ataggggaagtgttgagaaatatgtcagctt

**BAB3031** TAAGTAAAGGAGCTCCCTTGAGAA**GAG**CAATTCTGAAATGATTTTCCATGTTAGCAA

← **C17ORF51** (LINE) (+) gcaaatttgtttcagggtatgggt**GAG**CAATTCTGAAATGATTTTCCATGTTAGCAA

21442150

# BAB3133

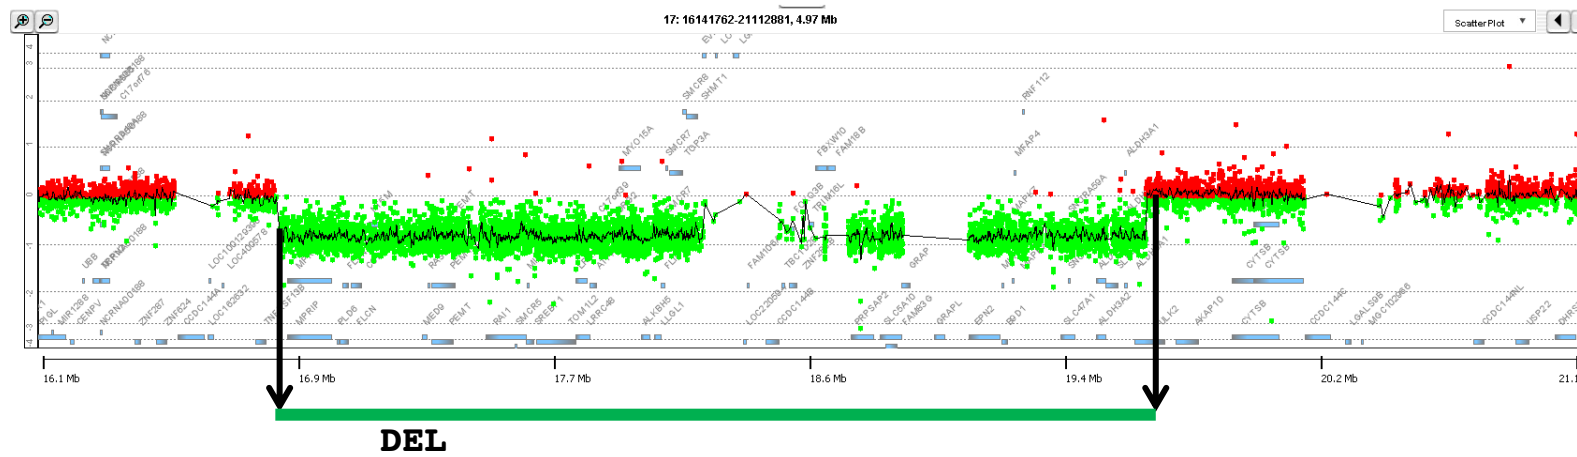

16916256

LCR\_ (*AluSz*) (+) AGGTGTGAGCCACCACGCCAGCCTGTTTT**TCA**catttctatttcacatgctccagaattca

**BAB3133** AGGTGTGAGCCACCACGCCAGCCTGTTTT**TCA**TGCTCATGAGGCTGTGTAAGTGATGGG

← *ULK2* (+) cagactaatgctaagccacagttgtgagc**TCA**TGCTCATGAGGCTGTGTAAGTGATGGG

19710487

# BAB1615

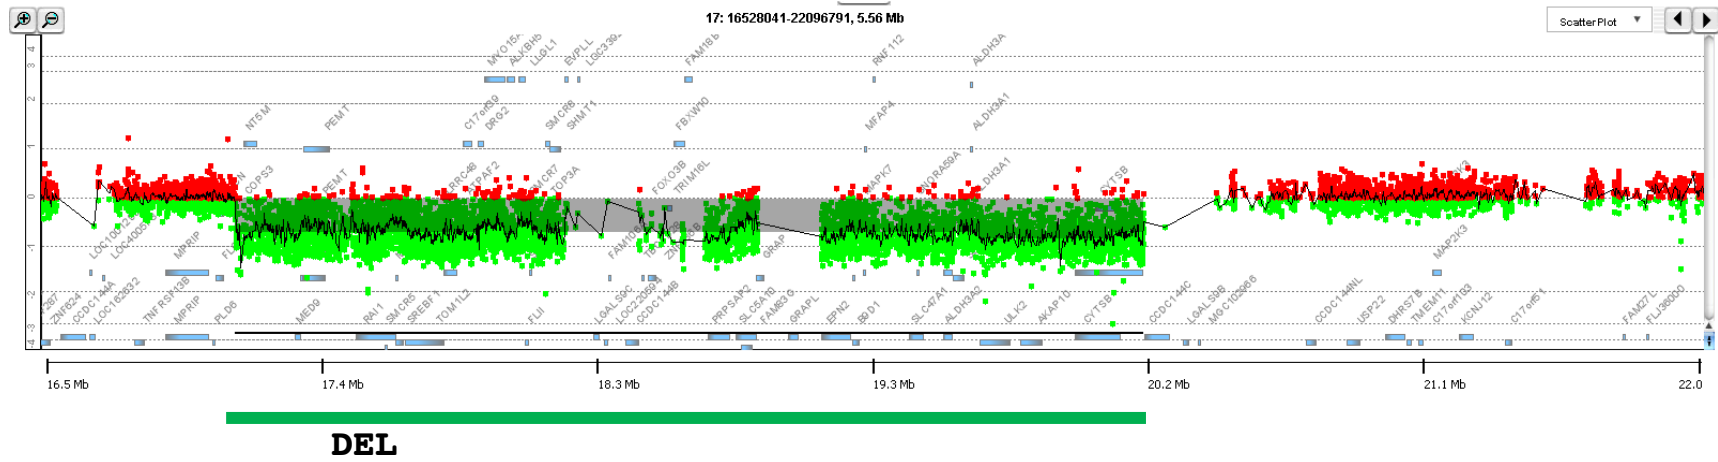

←

17179369

Ref\_COPS3 (+) GATGCTCCTTACAAAACAGCAAGGACG**CCcaAG**gagtgttcttgtacatccagagccc

BAB1615 GATGCTCCTTACAAAACAGCAAGGACG**CCccAG**CCTTCCTGAAAACACCACCTCCC

Ref\_Prox\_SMS\_REP (+) accctttctccatacctgctggggt**CCgcAG**CCTTCCTGAAAACACCACCTCCC

20415088

# BAB6311

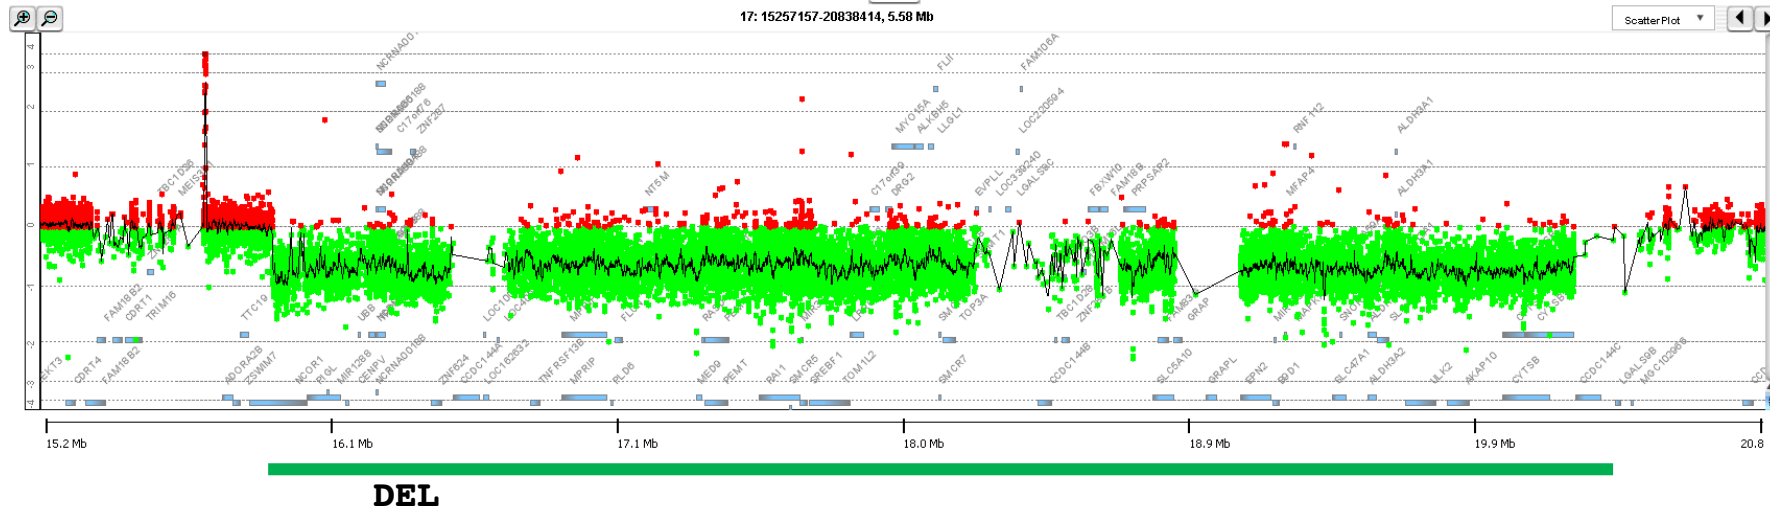

16008637

← Ref\_NCOR1 (AluJr) (+) GCCTATGGTCCCAGATACTTGGGGGG**ATGA-GgTG**ggaaaatcgcttgagcctgggag

**BAB6311** GCCTATGGTCCCAGATACTTGGGGGG**ATGA-GcTG**ACTTTAC-AAAATGTTGATGATA

Ref\_Prox\_SMS\_REP (+) attctgtctcattcattgaaacagaa**ATGAaGcTG**ACTTTACaAAAATGTTGATGATA

L20245447

↑ *De novo*  
20245463

# BAB8501

Jct outside of the captured region

Jct embedded in a LCR

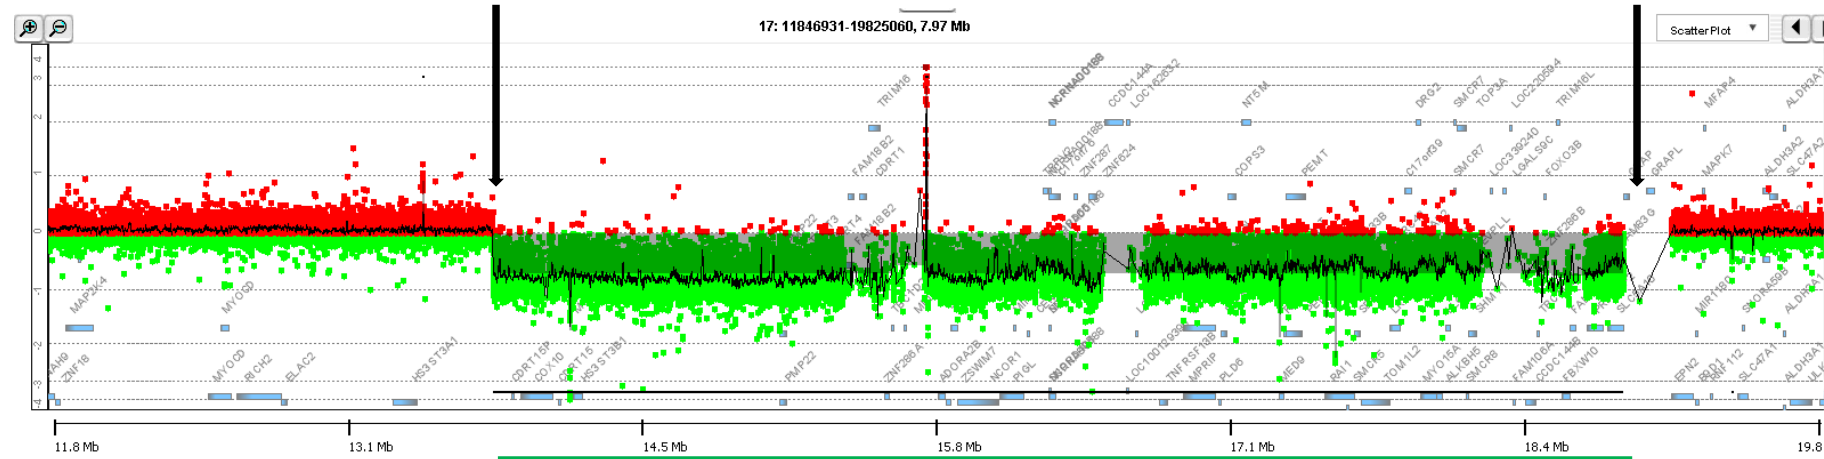

Maternal origin of this DEL

**DEL**

13845144

Ref\_Intragenic (MER58A) (+) GAGTTGGCAAGCTTTGTCTATAAAGGAC CAGT agcaaagggttcagactctgcaaaaca

**BAB8501** GAGTTGGCAAGCTTTGTCTATAAAGGAC CAGT GACTTTGCTCATCGTTGTCCCTGCGGTA

Ref\_LCR\_REPA/B (+) ccgtcccctctatgtcagcttcctgagg CAGT GACTTTGCTCATCGTTGTCCCTGCGGTA

19105614\*

# BAB2695

Breakpoint for small triplication-40,930bp

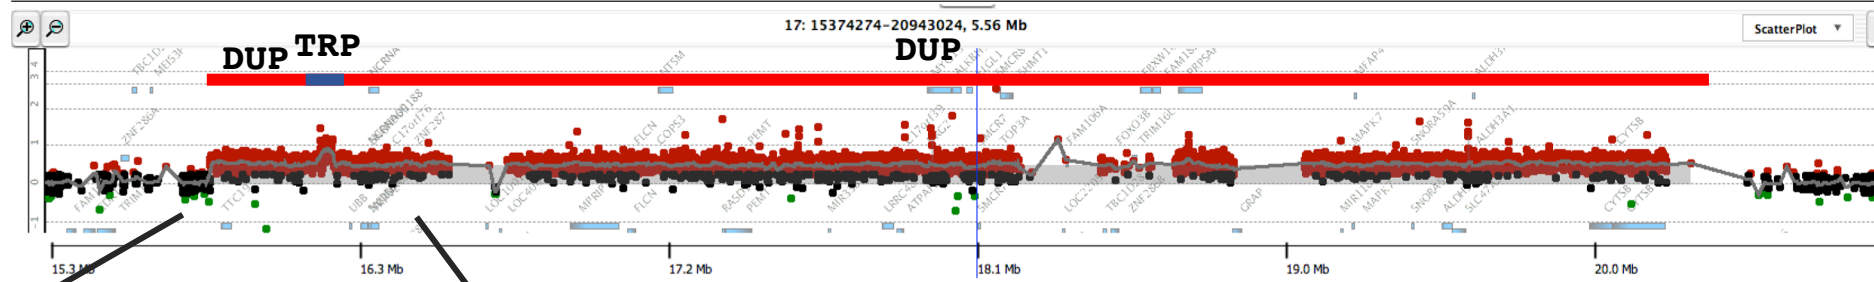

Triplication

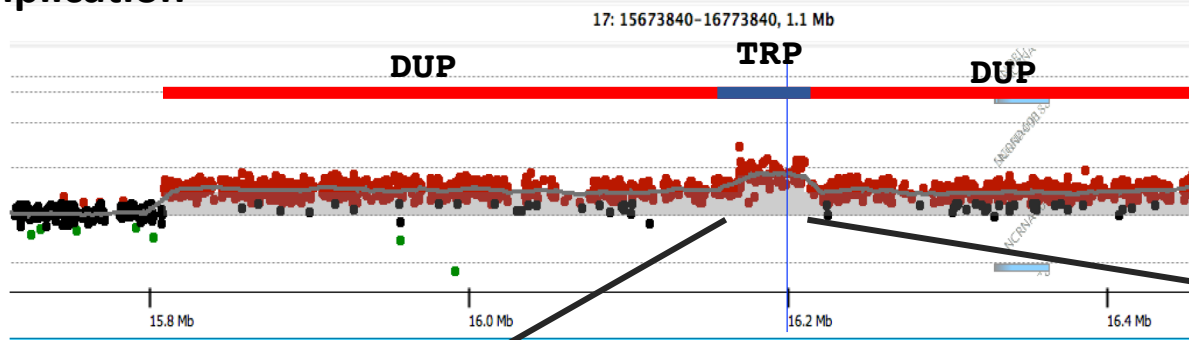

39 Kb Duplication

16237498 (+)

Jct1

Proximal *AluY* (+) AAATTTGATGATCACGCCGGGTGCGGTGGCTCACGCCTGTAATCCAGCACTTTGGgaggctgaggcaggcgtattacgaggtcaggagatcgaga  
 BAB2695 AAATTTGATGATCACGCCGGGTGCGGTGGCTCACGCCTGTAATCCAGCACTTTGGAAAGGCCAAGGTGGGTGGATCACGAGGTCAGGAGATCCAGT  
 Distal *AluY* (+) aattgcaatcttctggcctggcgcaGTGGCTCACGCCTGTAATCCAGCACTTTGGAAAGGCCAAGGTGGGTGGATCACGAGGTCAGGAGATCCAGT

16196568 (+)



# BAB2695

Tandem Duplication Breakpoint in PTL5 Individual 2695

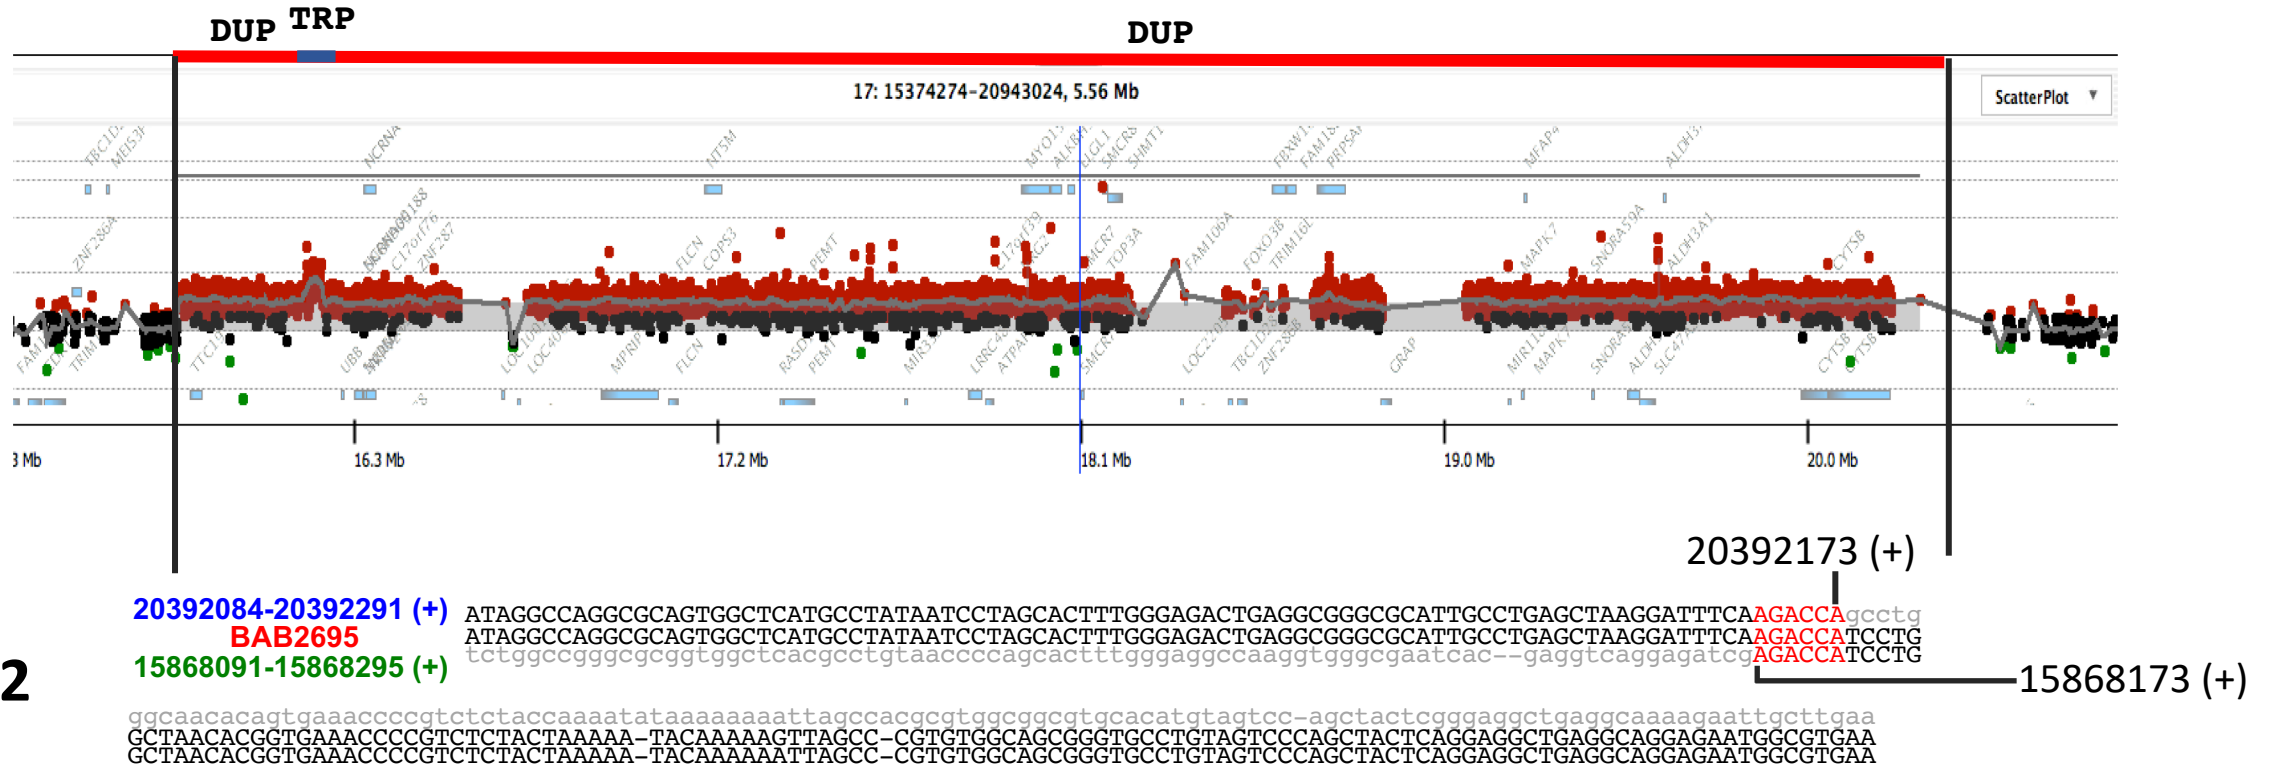

Jct2

*AluSx* to an *AluY* in direct orientation  
 within 6 bp microhomology (in red). *AluSx* in Prox\_REP

# BAB3344

17: 16462095-17562095, 1.1 Mb

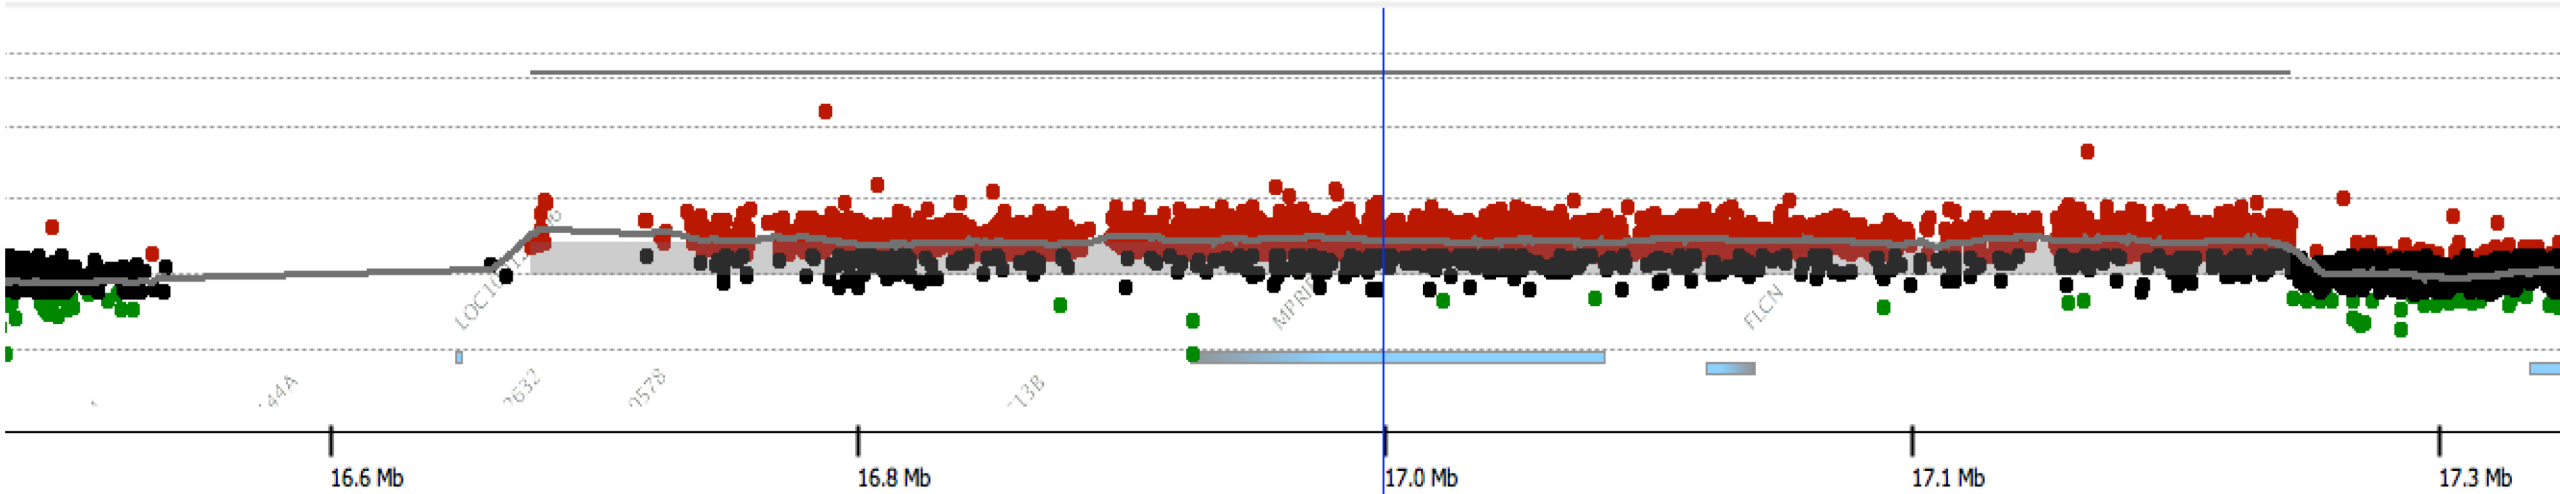

17326680 (+)

Exon 3 (last exon) of *SMCR9*

17326680 CAGGAGACATCATCCTAAATGTCAATGGGATGGACATTAGCAAAGTCTCTcacaactacgctctgcatctcctgcggcagccctaccagggtgttgtgactgaccatgctgcacaaccagaa

Patient CAGGAGACATCATCCTAAATGTCAATGGGATGGACATTAGCAAAGTCTCTTTATTTTTGTCTGACTGGGCTGACTCAAAGACAGGTCTTTGAGCTCTGTAATCCTTCCCTCCGCTTGGTC

16654065 aaatcccacattcctcagatgttttgttcatttttaaaatggttttTCTTTATTTTTGTCTGACTGGGCTGACTCAAAGACAGGTCTTTGAGCTCTGTAATCCTTCCCTCCGCTTGGTC

Intron of *CCDC144A*

16654065 (+)

Distal side within Distal\_REP

# BAB3793

Beginning of DUP\_1 to Beginning of DUP\_2

17: 15435002-19147502, 3.71 Mb

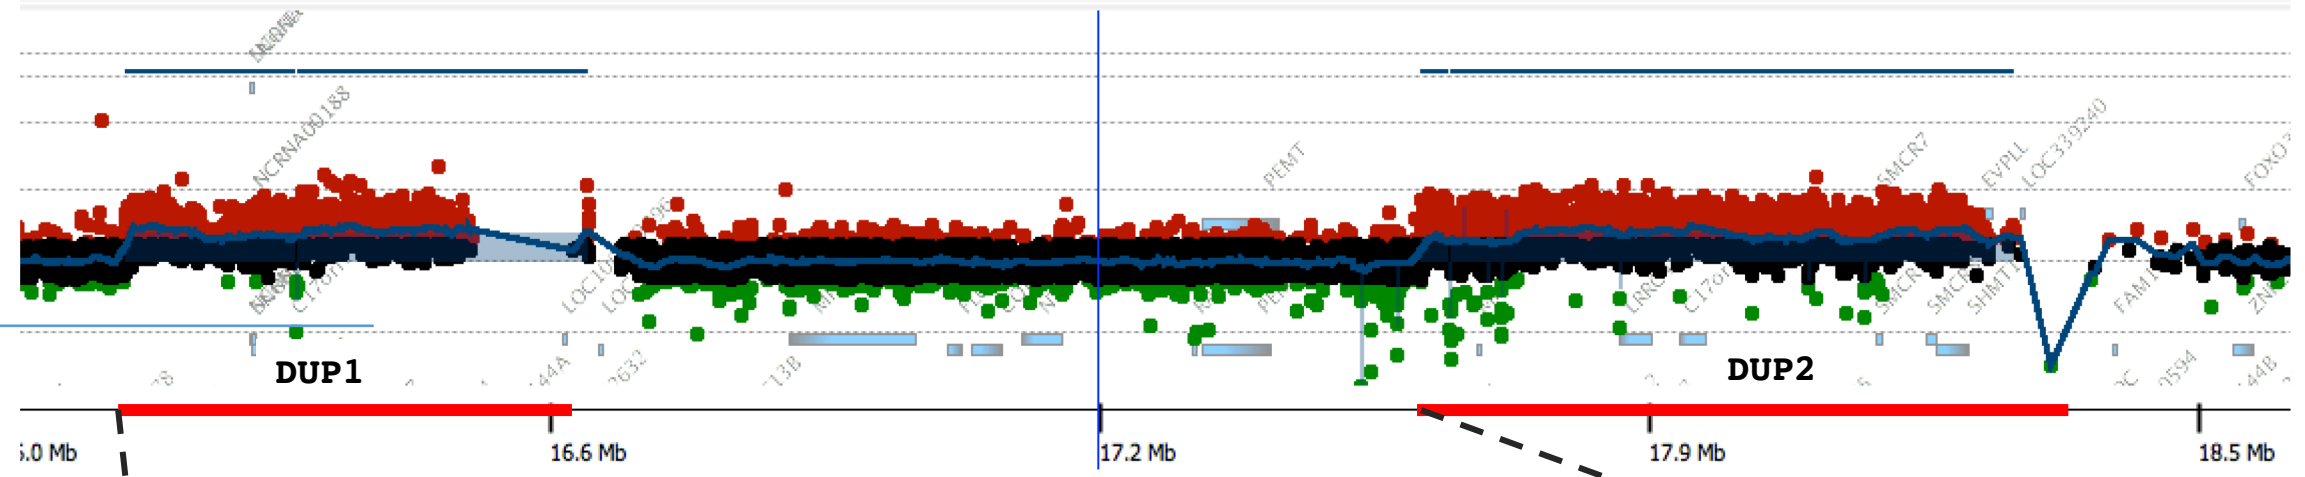

Jct1

16203013(-)

Intron of *PIGL* ←

GAGATTTACAAACATGAAACAAC TAGAAATTAATGCATAA **TT** ccacacaacacacttttggagctttatgcttggtgctgagggttaag

BAB3793 GAGATTTACAAACATGAAACAAC TAGAAATTAATGCATAA **TT** (\*\*\*\*\*) **ATC** CAGGAGCACTTCGAGTGTGCTATTTTCTCCTCTGAG

ggcggaggtctttctgccactcttggtaacatcaaggaatgaatgagc **ATC** CAGGAGCACTTCGAGTGTGCTATTTTCTCCTCTGAG

Intron of *RAI1* →

17652760(+)

(\*\*\*\*\*) represents the insertion of 74 bp from Chr17:17662297-17662370 (from intron 2 of *RAI1*)

**TTTACTTAGAGGTTCTGGTCGCCATGGAAGGTTTCAGCTGAGGAGGAACAAAGATTGGGTTGGGGAGTATC**

Both sides are in unique regions

Jct2 (not determined at nt level) is from Distal to Middle\_REP (paralogous LCRs); See Figure 3

# BAB2337

NR- complex (DEL-NML-DUP-NML-DEL-NML-DUP-TRP-DUP-TRP-DUP)

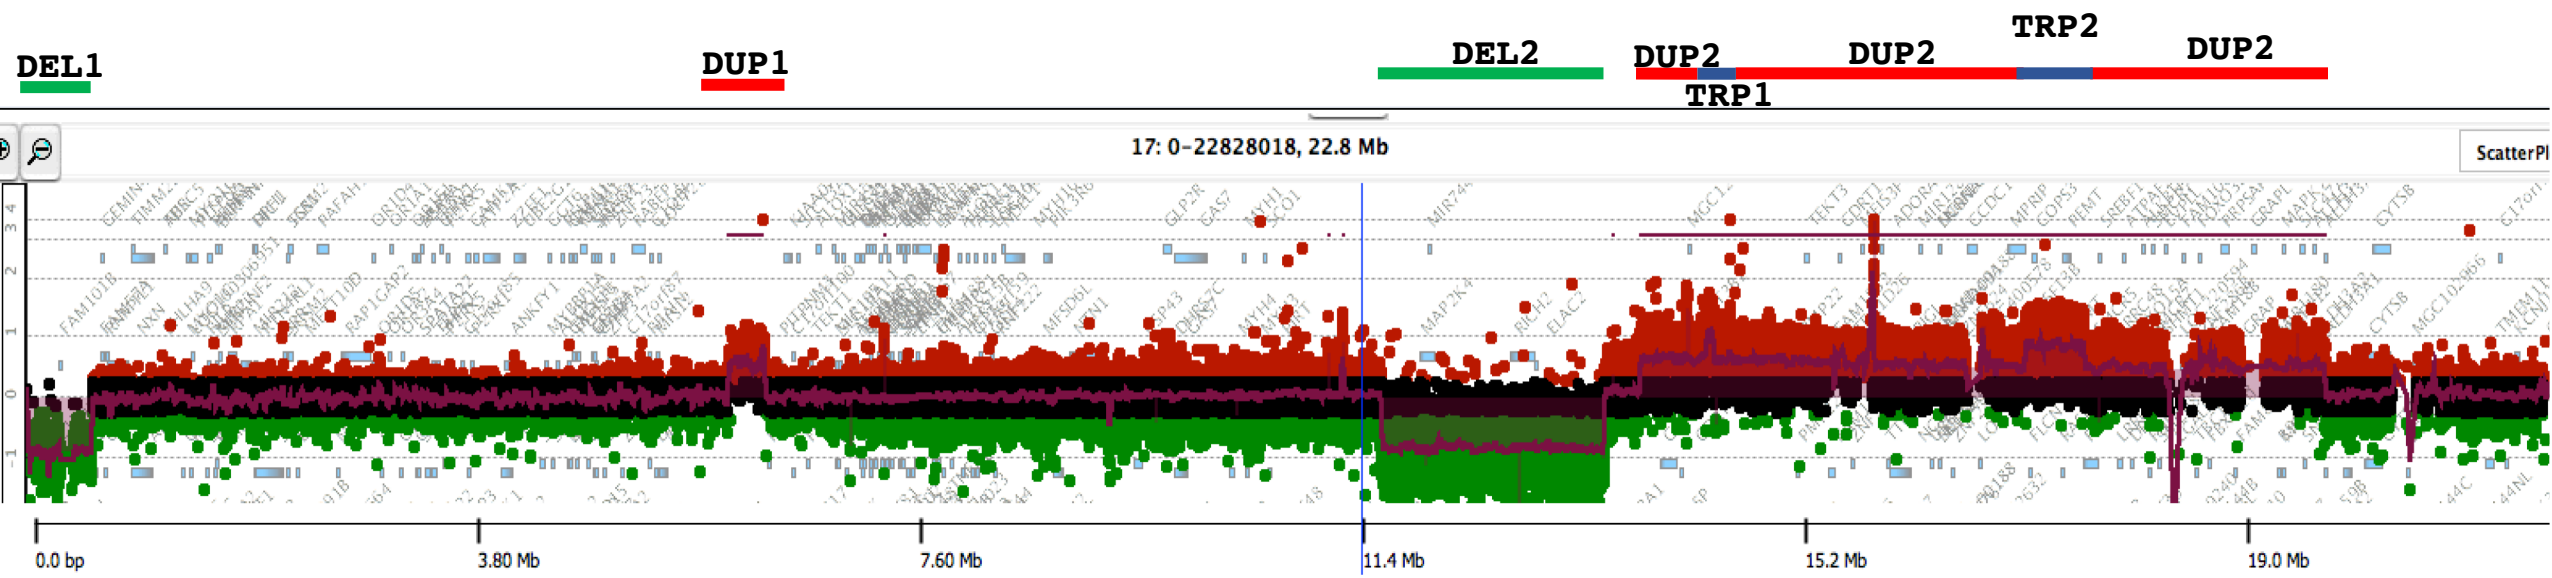

NR- complex (DEL-NML-  
DUP-NML-DEL-NML-DUP-  
TRP-DUP-TRP-DUP)

# BAB1229

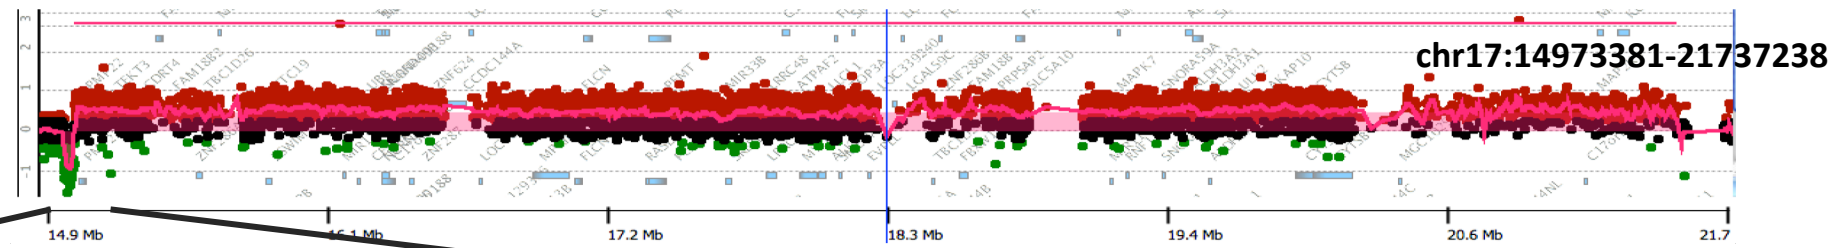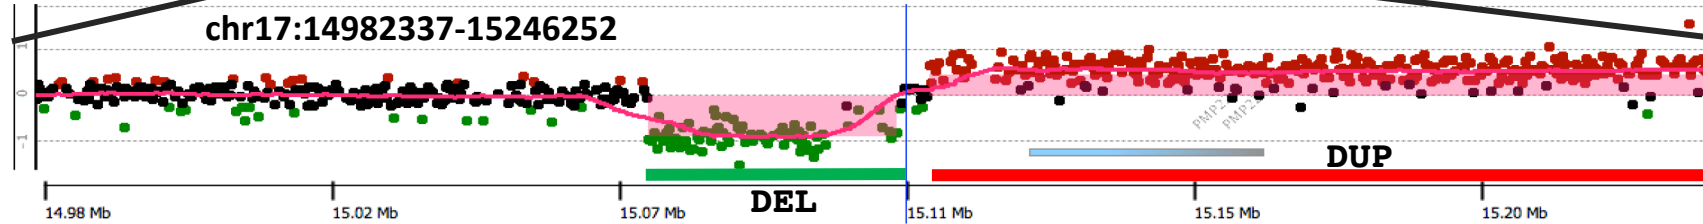

**Jct1**

39 Kb Deletion

15075315 (+)

```

TGAGCTCCACATGTGGAATCTCCCCAGACCCCATGACCTTCatacacatttcaccatttcccagagccag
TGAGCTCCACATGTGGAATCTCCCCAGACCCCATGACCTTCTGCTTCCTAACAACCACTGAGATAATTTG
attcttactgcaggggattggagtcaacataattaACCTTCTGCTTCCTAACAACCACTGAGATAATTTG
    
```

Coordinates in hg19

15113726 (+)

**Jct2**

6.7 Mb Dup

21968267 (+)

```

ATGGAATGGAATGGAATGGAAAGAAAGGAATAGAAggcaaaggaatcggatggaatggaatggagtcgaatgg
ATGGAATGGAATGGAATGGAAAGAAAGGAATAGAATTTTGGAATGCGCAGACTAGACTGTGAGTGATACGGTC
agtatcatttgaaattctaacaatgtagatttaAATTTTGGAATGCGCAGACTAGACTGTGAGTGATACGGTC
    
```

Coordinates in hg38

15214631 (+)

Deletion and duplication occurred in *cis* in the maternal haplotype as determined by GATK genotyping and B allele frequency of the regional Illumina data  
 Del previously characterized in Zhang *et al.* 2009 Nat genet.

# BAB2543

End of DUP\_1 to End of DUP\_2

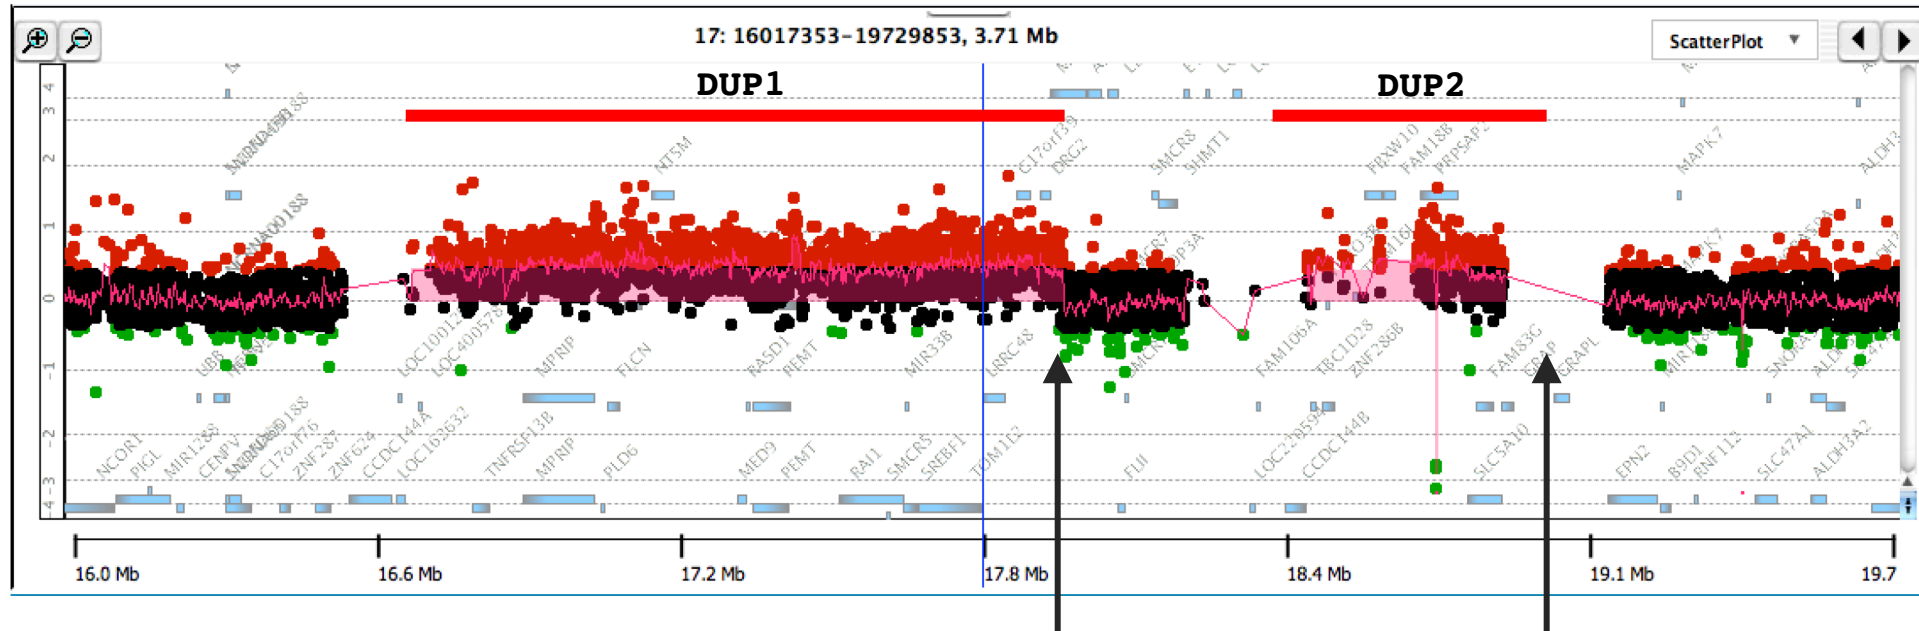

*AluSz*  
**Jct1** 18037186 (+) GCCCCACTAATTTTTGTATTTTTAGTAGAGACGGGGTTTCACCATGTTGGCCAGGCTGGTCTTGAACTCCTGAC  
 19015148 (-) GCCCCACTAATTTTTGTATTTTTAGTAGAGACGGGGTTTCACCATGTTGGCCAGGCTGCTCCTGAACACCTGAG  
*AluSx*  
 19015148 (-) 29bp microhomology

Non-paralogous LCR Breakpoint is *AluSx-AluSz* mediated (Sx within REPA/B)  
 Jct2 is between paralogous repeats- between Distal and Middle\_REP

# BAB2811

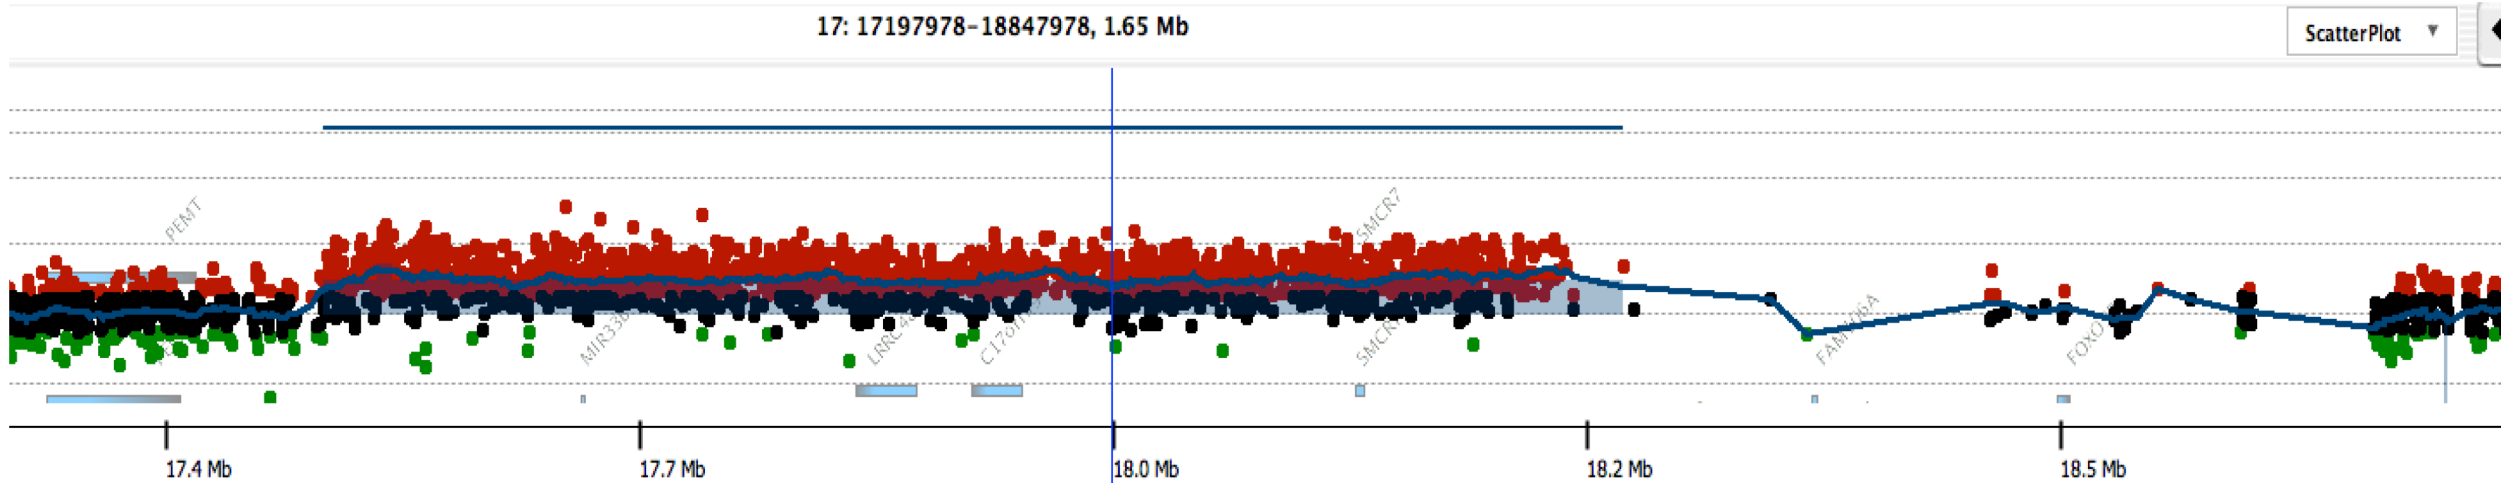

Middle\_REP on proximal side of duplication

17568703 (+)

Patient

```
AGCTTGGGTGATAGAGTGAGACTCTAAAAGAAACACACACACA-CA-CACACACAATTTTAAGTTTTATTTCTTTTAAATTGATT
ACCTTGTGAAAGATTCATGTAATTGACCAGTGTTTACCAAGCA-CA-CACACACAATTTTAAGTTTTATTTCTTTTAAATTGATT
ACCTTGTGAAAGATTCATGTAATTGACCAGTGTTTACCAAGCAgCAtCAGTGTTTCAGTTTCAGTCATTGGTGATTCCGCAGTTGG
```

18320581 (+)

# BAB2986

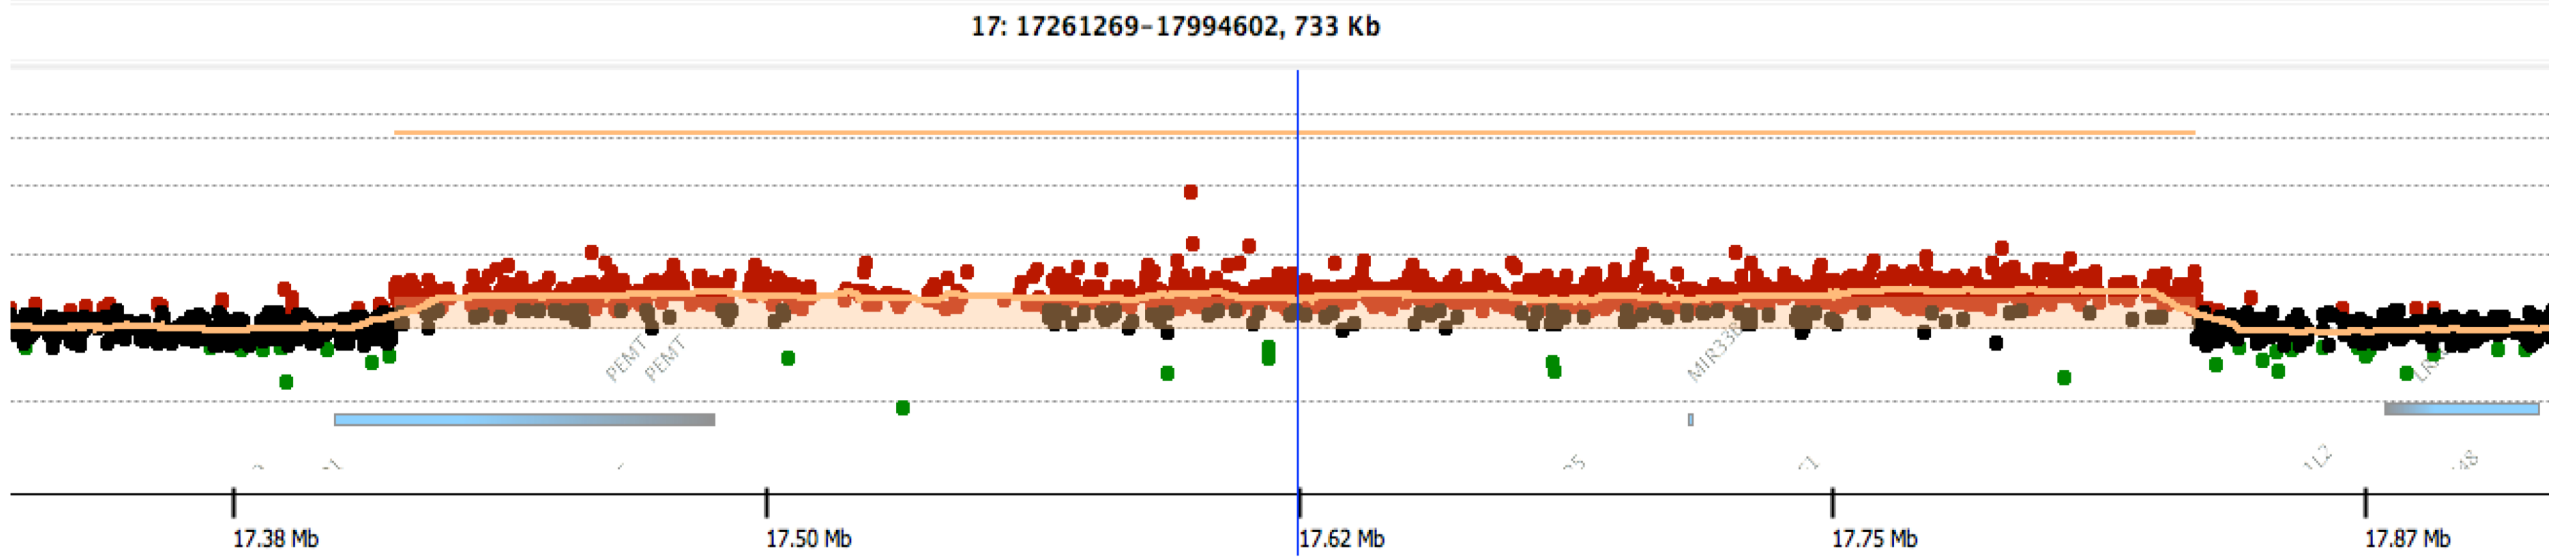

←  
Intron of *TOM1L2*, downstream of *AluSp*

17833037 (+)

Patient **TTTCAGAGCAGTAGTTAACTTTTTGGATAAGATGTTAAAGGAAG**AATACATTCCCTTTGAAAATCTGATAAGACCTTTCCAGAGA  
TGCCCCGGGCTCCCTGACCACCTCTGGATGCACTGCTGGTGC**A**GACCTGCTAACATAGTGACCTACTCTCCCCTGGGACCCGC

←  
Intron of *PEMT*

17421889 (+)





# BAB8123

8123 |

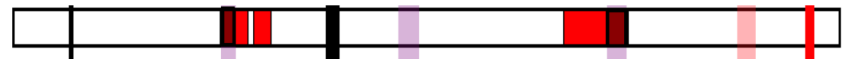

17: 15638067-21206817, 5.56 Mb

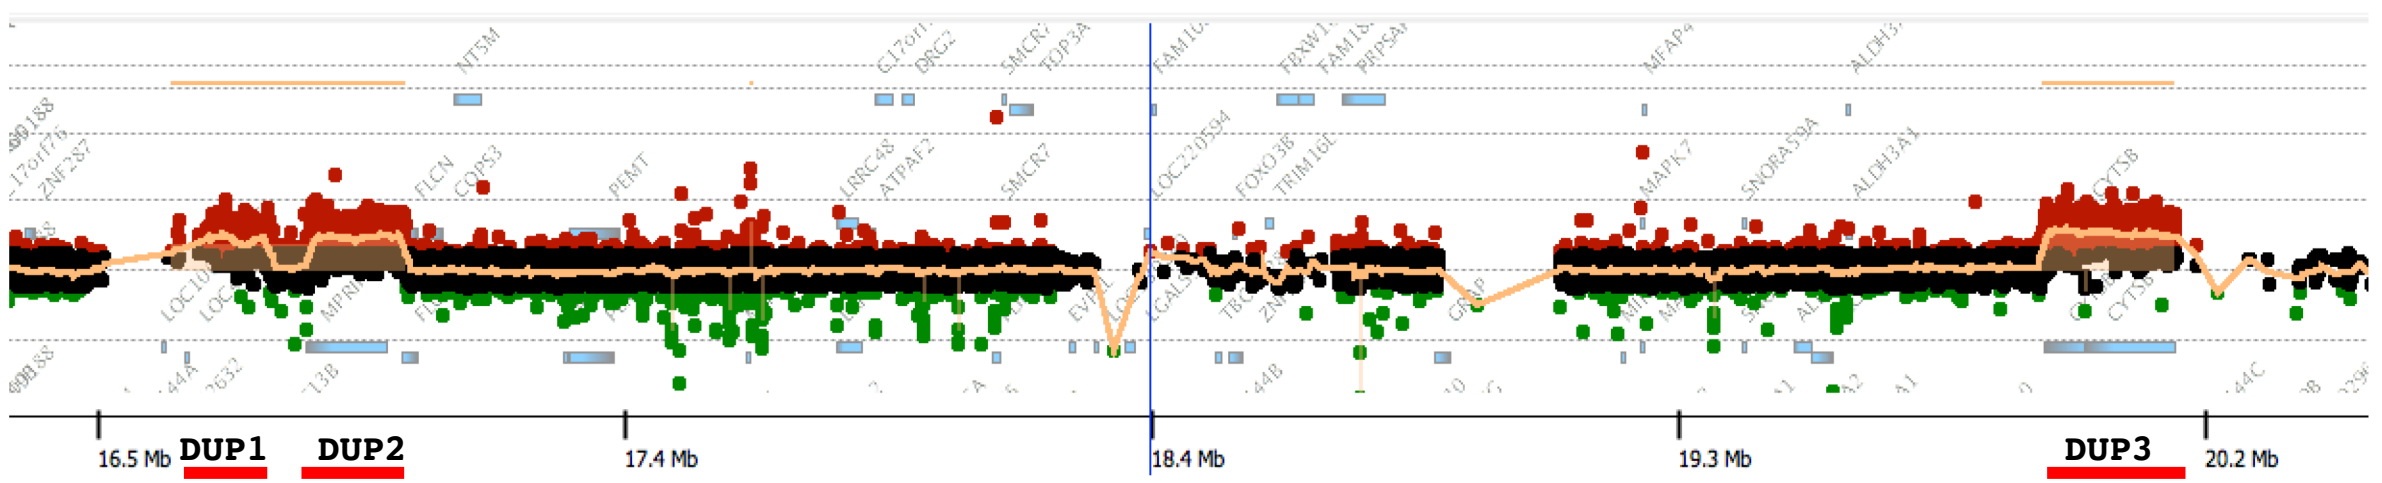

## Jct1

End DUP1 to beginning of DUP2

L1ME3C, in intron of *LOC284191* ← SNP | 16881170 (+)  
 GGCTCTATCTTCCAGGCCCTTTTATACTTTTATGAGTACAGTACAGAATGTTTTAGCTATGAAAAATACAGTATATAGCATTATTTTGCCTGTTATTTTTAAACATTTTATATAAAATAGCAT  
 Patient GGCTCTATCTTCCAGGCCCTTTTATACT **cagg** CCGGAGGCAGAGCTTGCAGTGAGCCGAGATGGTGCCACGGCACTCCAGCCTGTGTGACAGAGC **GAGACTCCGTCTCAAAAAAAAAAAAAA**  
 TS1 TACTCACGCGCTGAGGCAGGAGAATGGCGTGAACCCGGGAGGCAGAGCTTGCAGTGAGCCGAGATGGTGCCACGGCACTCCAGCCTGTGTGACAGAGC **GAGACTCCGTCTCAAAAAAAAAAAAAA**  
 AluY element | 16912929 (-) | 16912841 (-)

AluY element | 16912841 (-)  
 25bp microhomology |  
 TS1 GAGCTTGCAGTGAGCCGAGATGGTGCCACGGCACTCCAGCCTGTGTGACAGAGC **GAGACTCCGTCTCAAAAAAAAAAAAAA** CAAAAAAAAAACAGGCAAAAGTCATCTATGGAGACAGAAGTCCTG  
 Patient GAGCTTGCAGTGAGCCGAGATGGTGCCACGGCACTCCAGCCTGTGTGACAGAGC **GAGACTCCGTCTCAAAAAAAAAAAAAA** AAAAAAAAAAGAGGTGAAATTAATTTTAATTATGTTTTATTTAACC  
 GAGCTTGCAGTGAGCTGAGATtGcGCCACtGCACTCCAGCCTGgGcaAtAGAGt **GAGACTCCGTCTCAAAAAAAAAAAAAA** AAAAAAAAAAGAGGTGAAATTAATTTTAATTATGTTTTATTTAACC  
 AluYc, in intron of *MPRIIP* | 16953616 (+)

# BAB8123

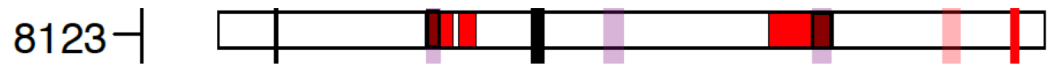

17: 15638067-21206817, 5.56 Mb

End of DUP3 to Beginning of DUP1- paralogous Distal and Prox\_REPs

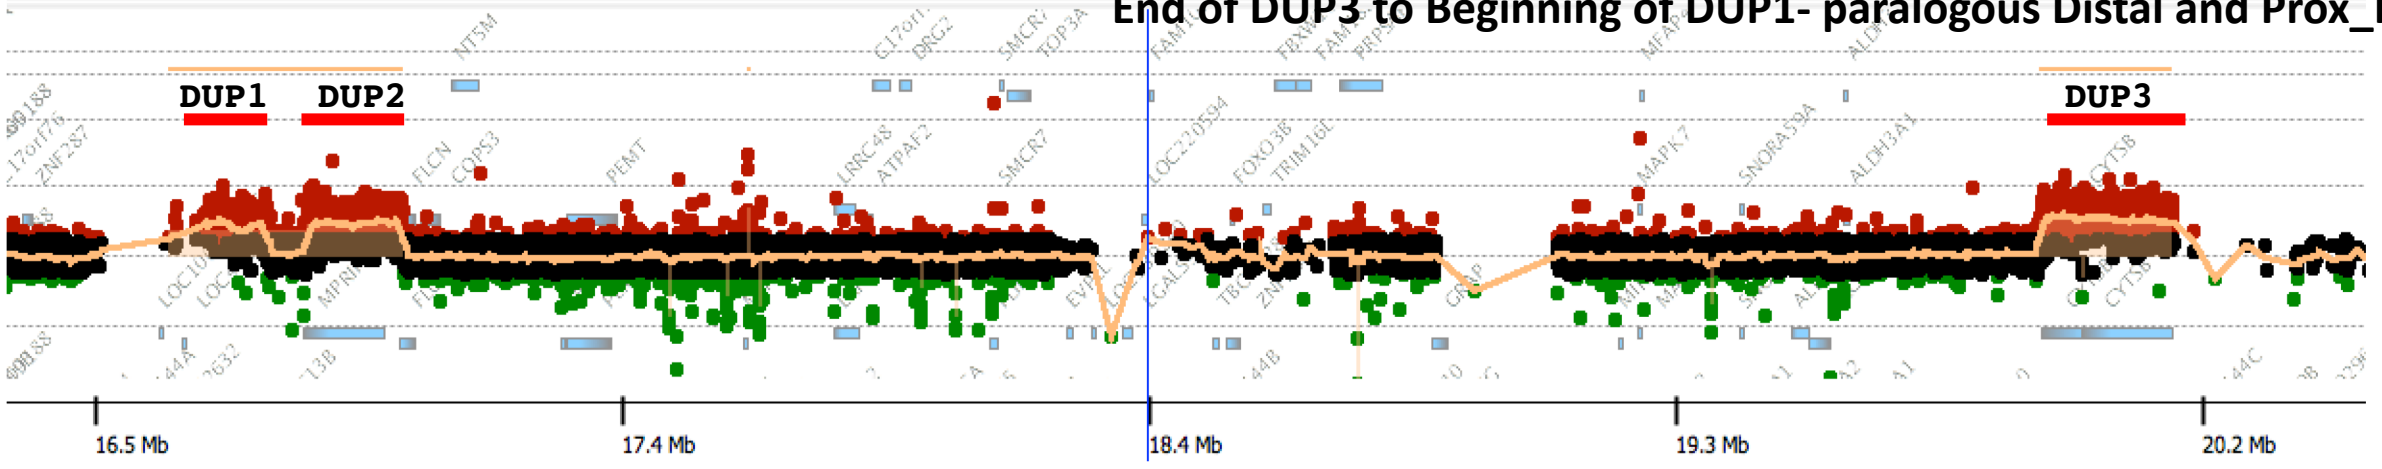

End DUP2 to beginning of DUP3

←←  
intron of *FLCN* and *PLD6*

**Jct2**

Patient GAGGCCTCCTCTCCACAACCCATGACAGAGATCTGGTTCCTTTGGGCCTGAGGCGTGGGGAACCTCAGCGCAGGGCATGGCCCCACAGCCCGCGGGGGCAC  
 ACAAATAAACAAGAGGCTGGGCACTGTGACTCAGCCTGTAATCCAGCACTTTGGGAGGCGAGGCGGGCAGATCACCTGAGGTCAGGAGTTTGAGACCAA

→  
*AluSq2*, in intron of *SPECC1*

17119625(+)

19987504(+)

# PTLS breakpoints Not Found

**BAB2965**

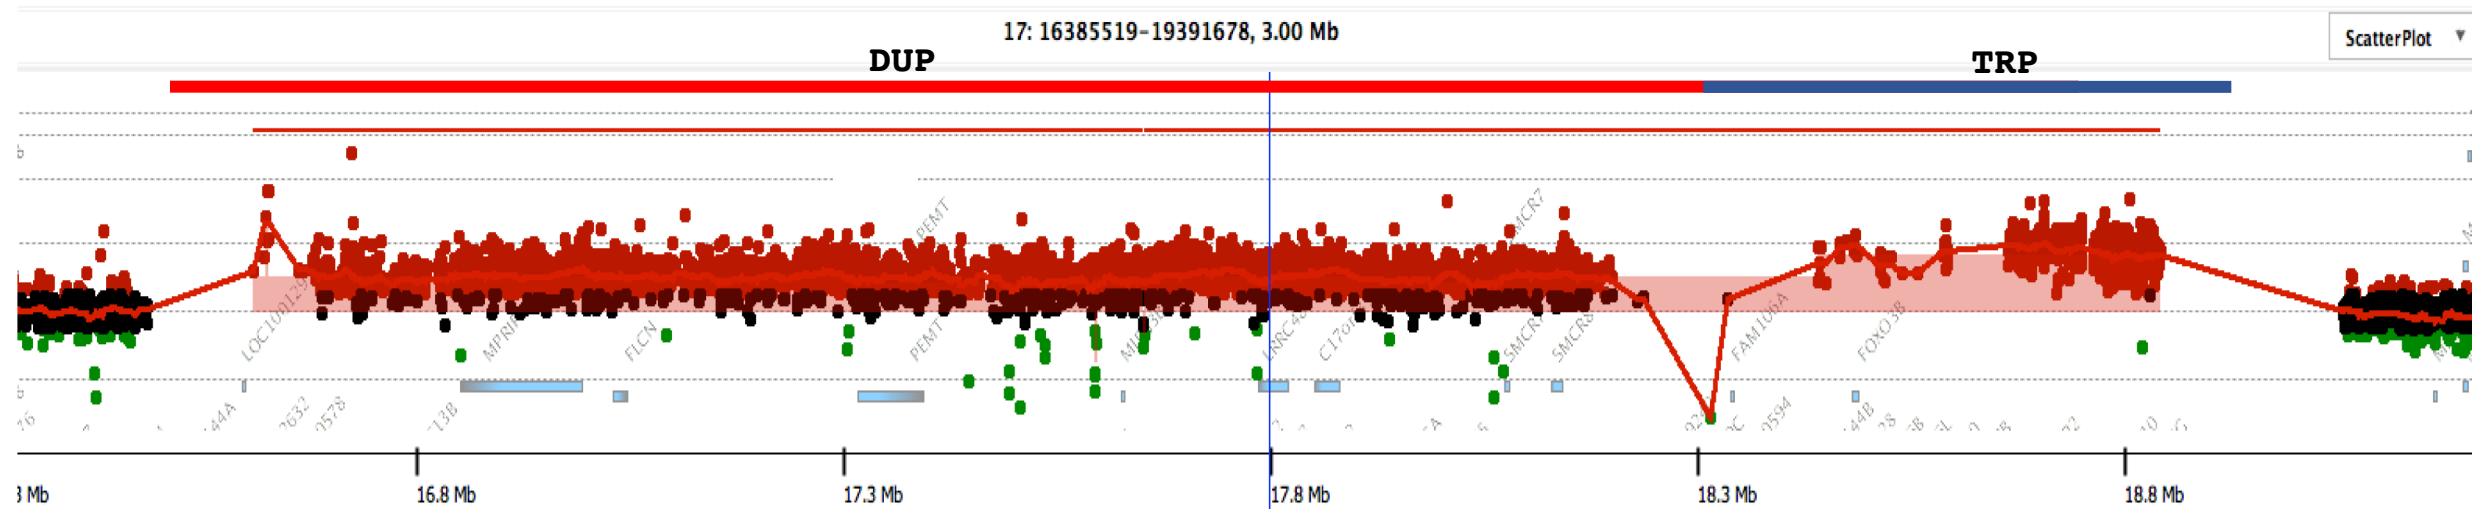

DUP-TRP Between Distal and Middle\_REPs (paralogous LCRs) and REPA/B



# PTLS breakpoints Not Found

BAB6917

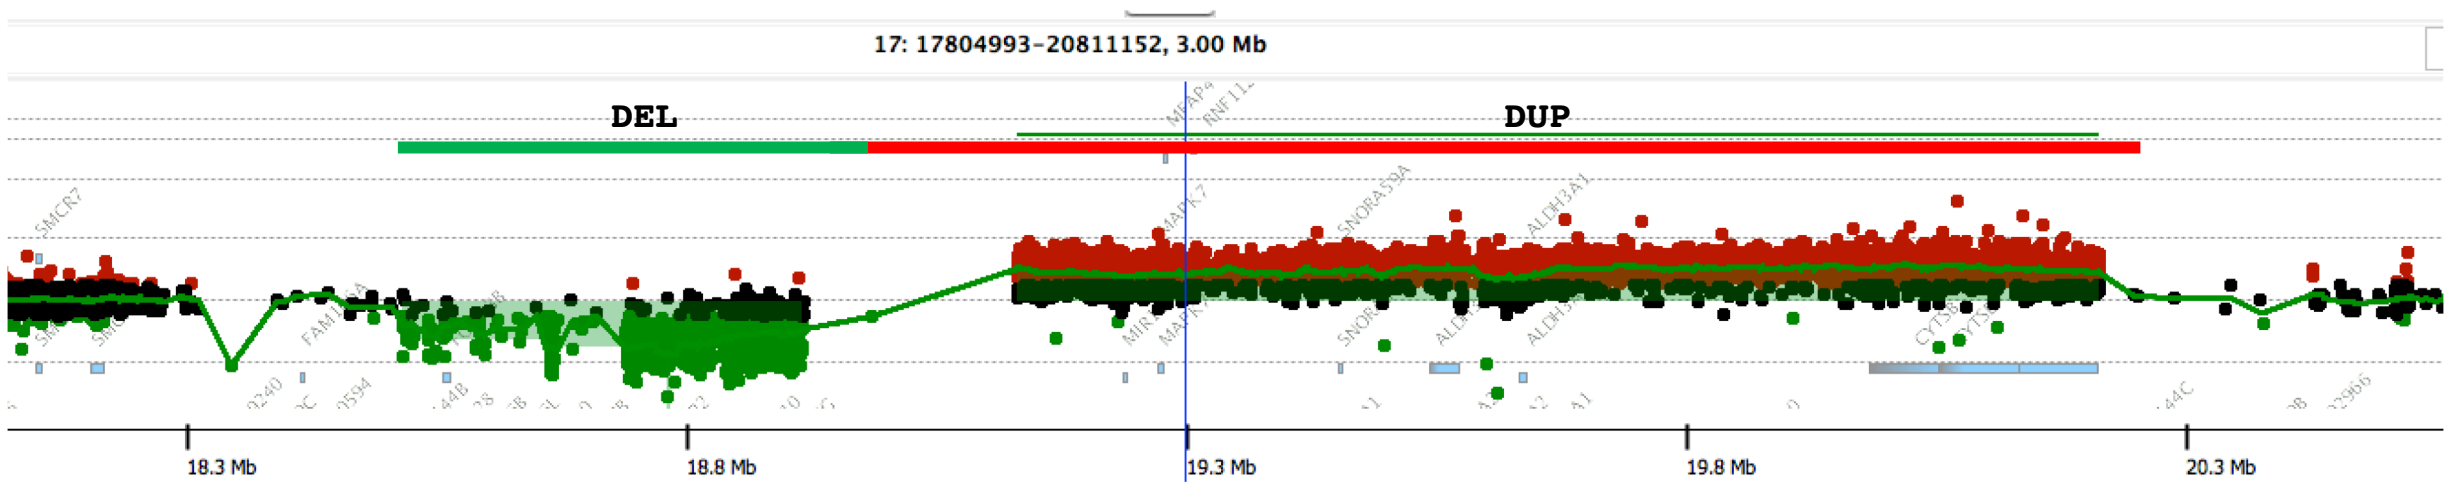

DEL-DUP with breakpoints between Middle\_REP and REPA/B and REPA/B and Prox\_REP

# PTLS breakpoints Not Found

BAB8325

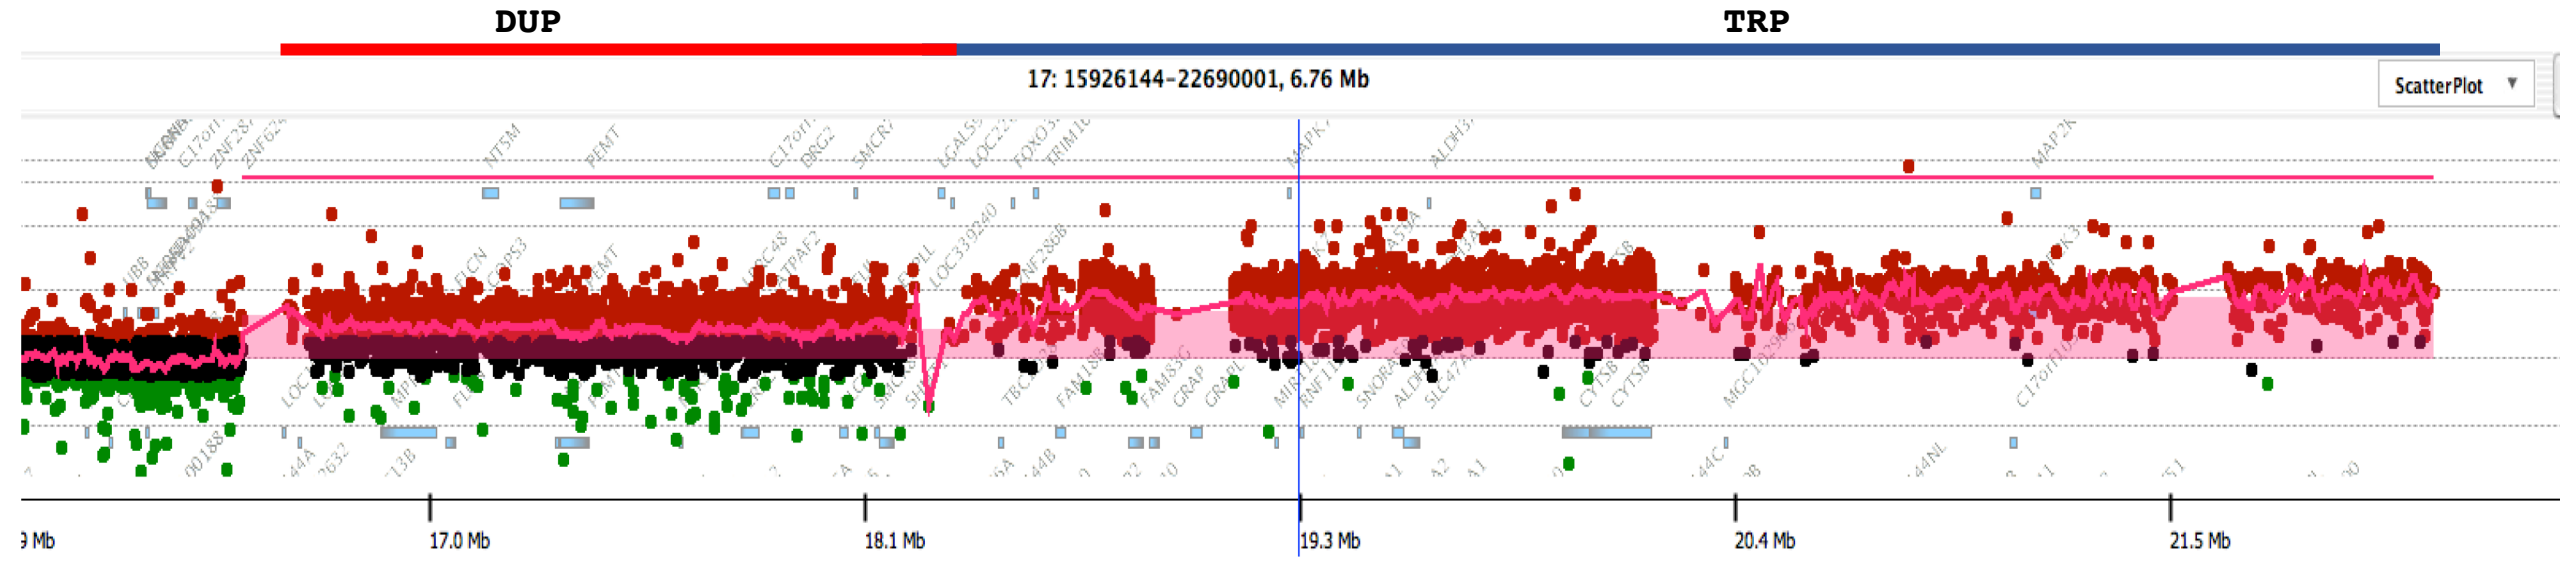

DUP-TRP between Distal and Middle\_REP and the Centromere
