# Supplementary material
Source: PubMed Central journal article supplement (PMC6438178)
Supplement: NIHMS1519975-supplement-Supplemental_Tables_S1_and_S4.pdf [file NIHMS1519975-supplement-Supplemental_Tables_S1_and_S4.pdf]

**Table S1- Individuals examined and data generated in this study; related to Figure 2**

| Rearrangement Class | Number of Trios | SMS Probands | PTLS Probands | PacBio Seq. | Illumina Regional Trio Seq. | Exome Trio Seq. |
|---------------------|-----------------|--------------|---------------|-------------|-----------------------------|-----------------|
| Non-recurrent       | 26              | 12           | 14            | 26 probands | 26                          | 26              |
| Recurrent           | 19              | 10           | 9             | N/A         | 19                          | 19              |
| Control             | 10              | N/A          | N/A           | N/A         | 10                          | 10              |
| Total               | 55              | 22           | 23            | 26          | 55                          | 55              |
