# Supplementary material
Source: PubMed Central journal article supplement (PMC6438178)

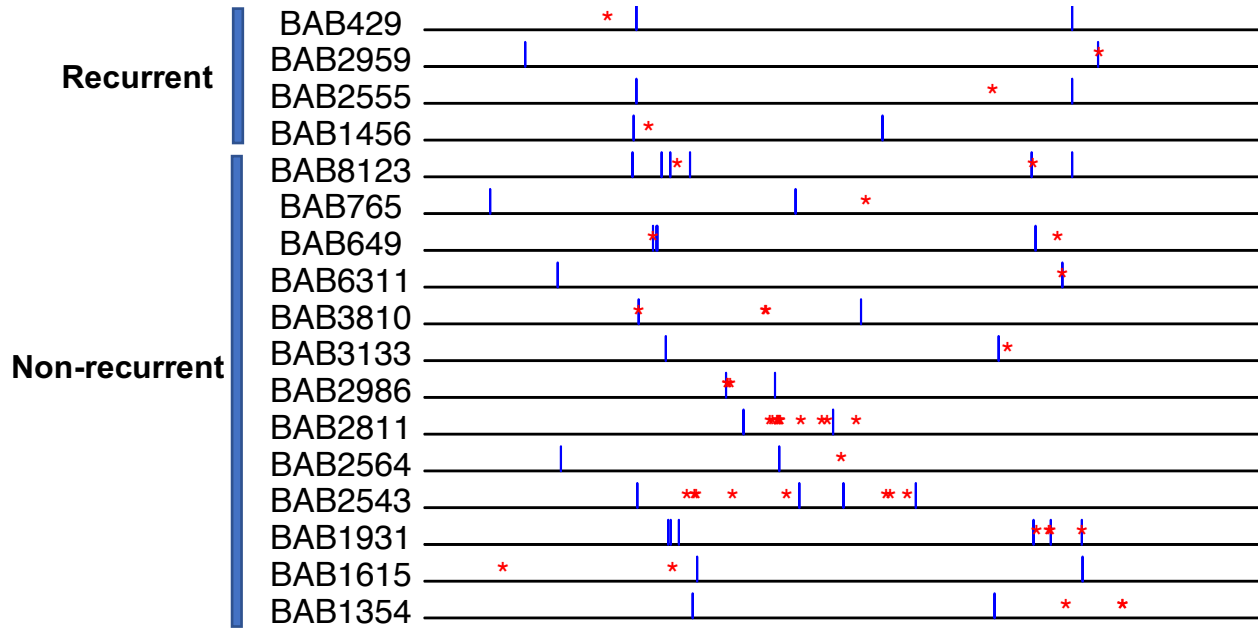

chr17: 14889851-21890851

Supplement: NIHMS1519975-supplement-Figure_S1.pdf [file NIHMS1519975-supplement-Figure_S1.pdf]

**A**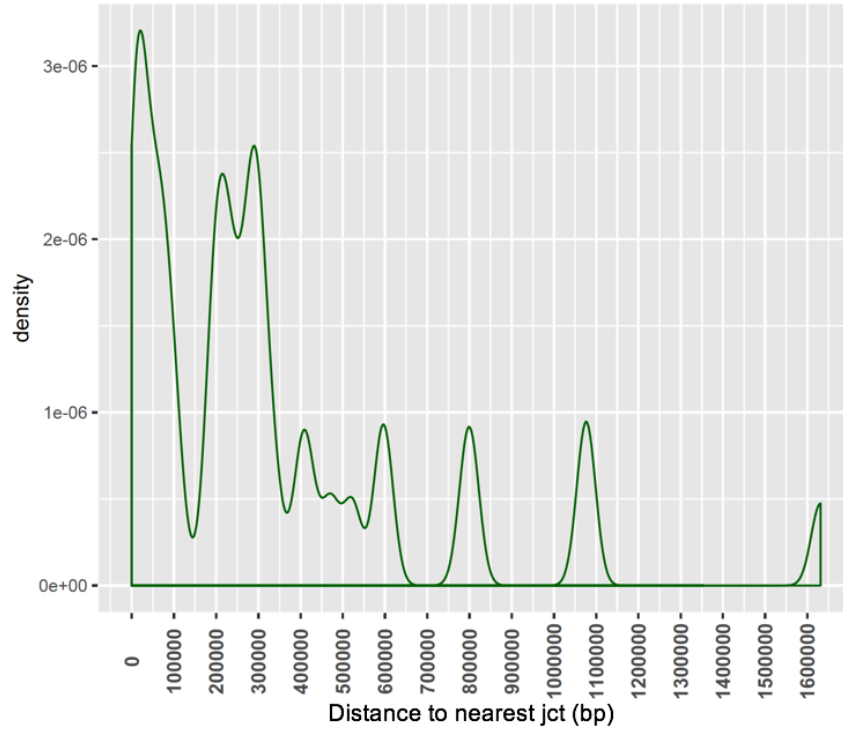**B**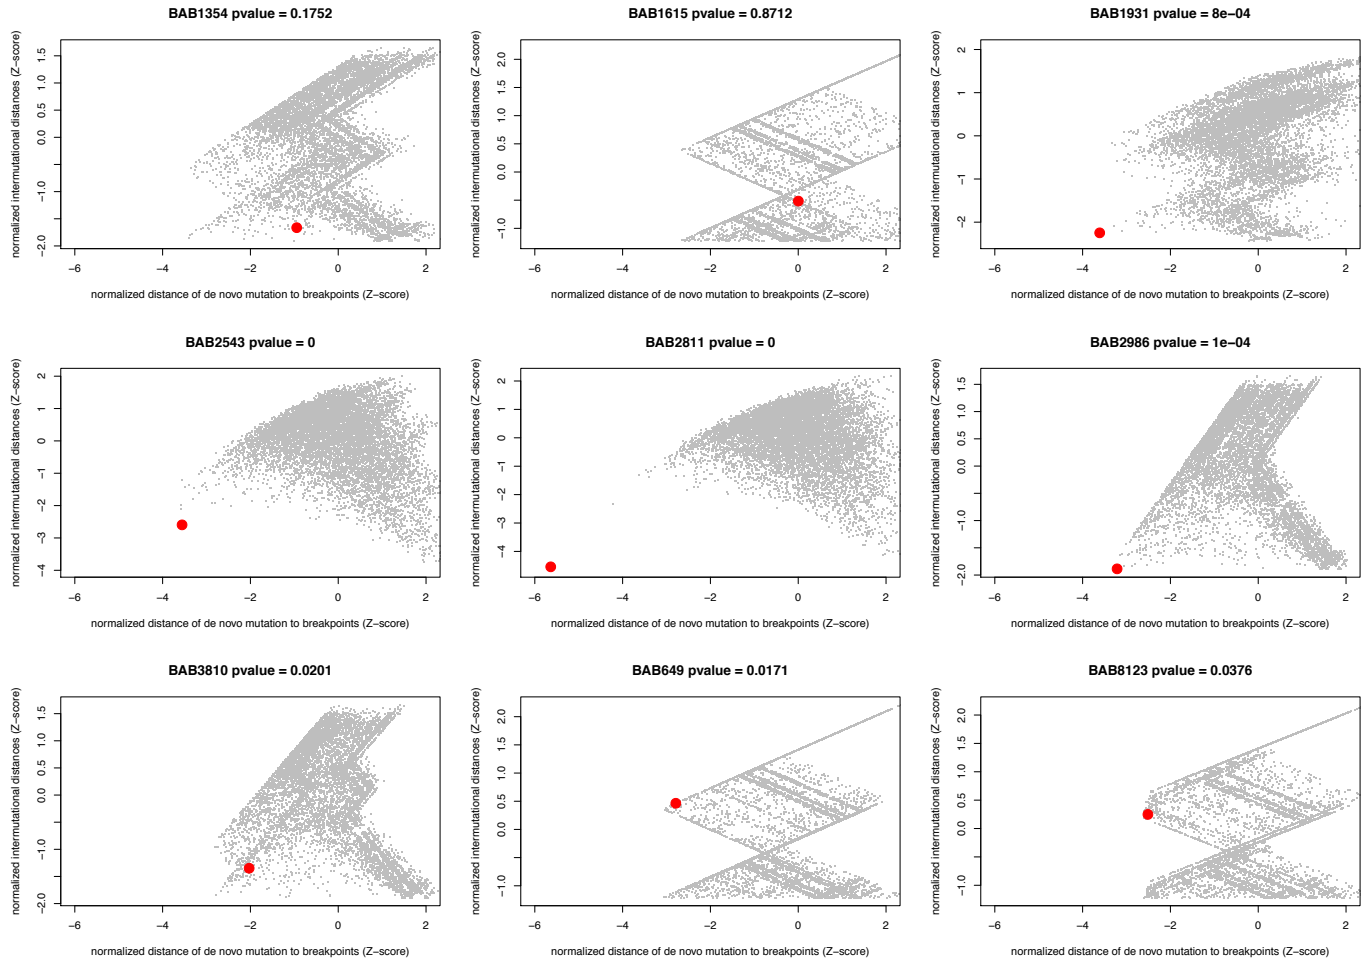

Supplement: NIHMS1519975-supplement-Figure_S2.pdf [file NIHMS1519975-supplement-Figure_S2.pdf]
